# Supplementary material for: CD103+CD8+ TRM Cells Accumulate in Tumors of Anti-PD-1-Responder Lung Cancer Patients and Are Tumor-Reactive Lymphocytes Enriched with Tc17
Source: PubMed Central journal article supplement — Cell Rep Med. 2020 Oct 20;1(7):100127. doi: 10.1016/j.xcrm.2020.100127 (PMC7659589; doi:10.1016/j.xcrm.2020.100127), 2020-10-20
Supplement: mmc1.pdf [file mmc1.pdf]

**Cell Reports Medicine, Volume 1**

**Supplemental Information**

**CD103<sup>+</sup>CD8<sup>+</sup> T<sub>RM</sub> Cells Accumulate in Tumors of  
Anti-PD-1-Responder Lung Cancer Patients and  
Are Tumor-Reactive Lymphocytes Enriched with Tc17**

**Stéphanie Corgnac, Ines Malenica, Laura Mezquita, Edouard Auclin, Elodie Voilin, Jamila Kacher, Heloise Halse, Laetitia Grynszpan, Nicolas Signolle, Thibault Dayris, Marine Leclerc, Nathalie Droin, Vincent de Montpréville, Olaf Mercier, Pierre Validire, Jean-Yves Scoazec, Christophe Massard, Salem Chouaib, David Planchard, Julien Adam, Benjamin Besse, and Fathia Mami-Chouaib**

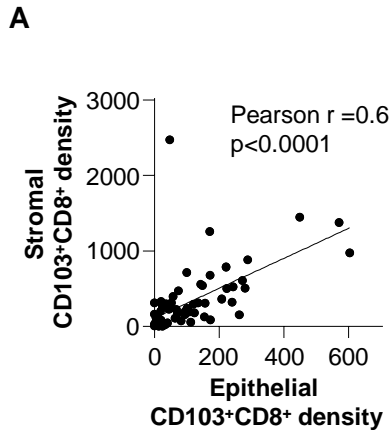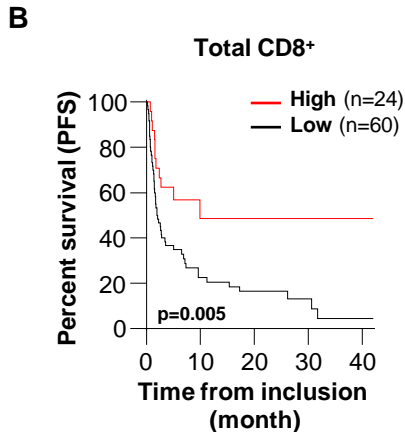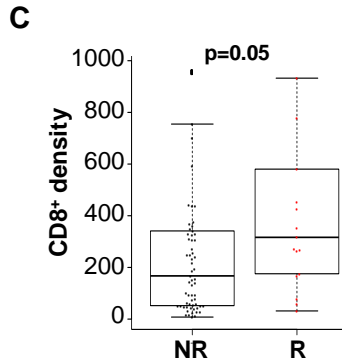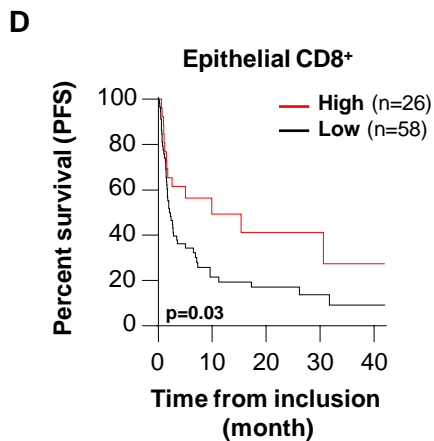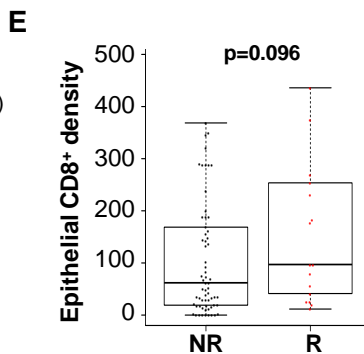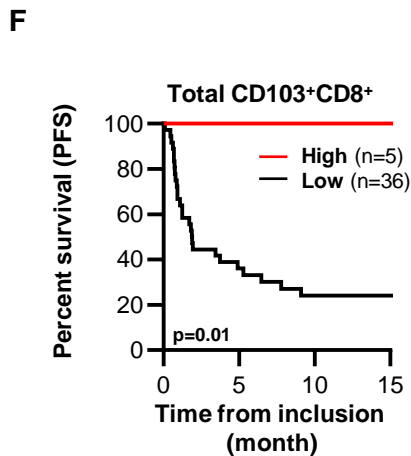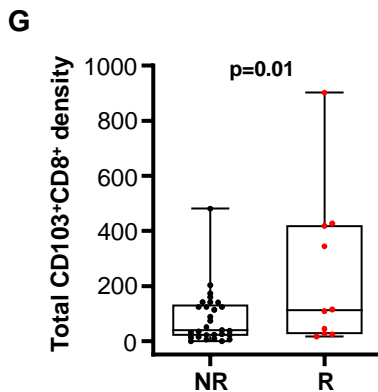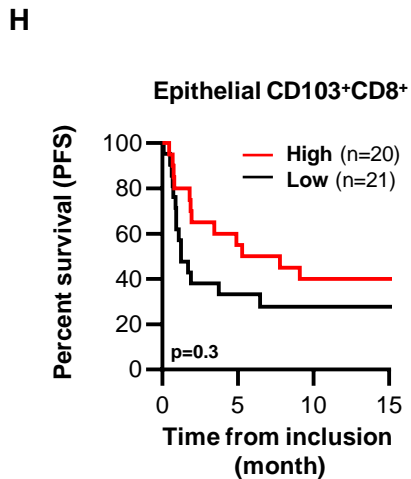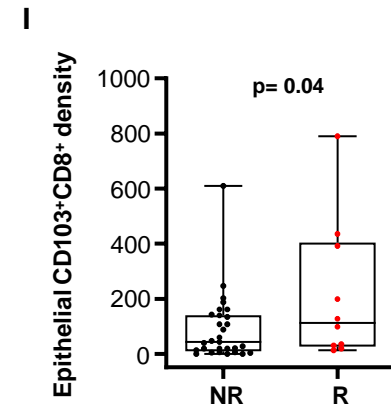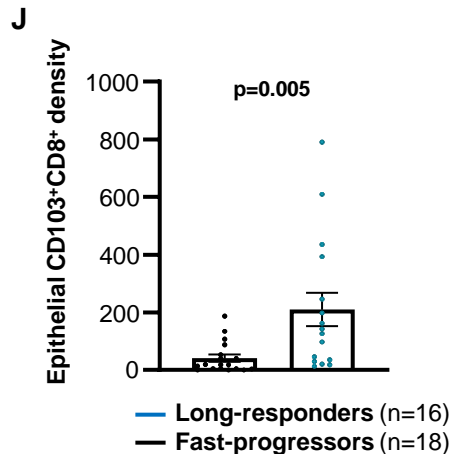

**Figure S1. Density of CD8<sup>+</sup> T cells in anti-PD-(L)1-treated patients. (Related to Figure 1)**

(A) Correlation between the density of CD103<sup>+</sup>CD8<sup>+</sup> cells in the stroma and in epithelial tumor regions. r-value indicates Pearson correlation coefficient. (B) Kaplan-Meier curve shows iPFS of PD-1 blockade-treated patients with tumors harboring a high density (CD8<sup>high</sup>>350/mm<sup>2</sup>) or a low density (CD8<sup>low</sup><350/mm<sup>2</sup>) of CD8<sup>+</sup> cells (n=86). (C) Density of CD8<sup>+</sup> cells in tumors depending on iORR of non-responder (NR; n=65) and responder (R; n=17) patients to PD-1 blockade. (D) Kaplan-Meier curve shows iPFS of anti-PD-1-treated patients with epithelial tumor regions harboring a high (>169/mm<sup>2</sup>) or low (<169/mm<sup>2</sup>) density of CD8<sup>+</sup> cells (n=86). (E) Density of CD8<sup>+</sup> cells in epithelial tumor regions depending on iORR of NR (n=65) and R (n=17) patients to PD-1 blockade. (A-E) Discovery cohort. (F) Kaplan-Meier curve shows iPFS of PD-1 blockade-treated patients from a validation cohort with tumors harboring high (>252/mm<sup>2</sup>) or low (<252/mm<sup>2</sup>) densities of CD103<sup>+</sup>CD8<sup>+</sup> cells (n=41). (G) Density of total CD103<sup>+</sup>CD8<sup>+</sup> cells in tumors depending on iORR of NR (n=29) and R (n=10) patients to PD-1 blockade. (H) Kaplan-Meier curve shows iPFS of anti-PD-1-treated patients with tumor epithelial regions harboring a high (>48/mm<sup>2</sup>) or low (<48/mm<sup>2</sup>) density of CD103<sup>+</sup>CD8<sup>+</sup> cells. (I) Density of CD103<sup>+</sup>CD8<sup>+</sup> cells in epithelial tumor regions depending on iORR of NR (n=29) and R (n=10) patients to anti-PD-1. (J) Density of CD103<sup>+</sup>CD8<sup>+</sup> cells in epithelial tumor regions of anti-PD-1-treated patients undergoing a long-response (PFS>6 months and OS>12 months; n=16) or a fast-progression (defined by an “early death” occurring during the first 12 weeks since the beginning of ICB; n=18). (F-J) validation cohort. p-value was determined by log-rank (B, D, F and H) or Chi2 test (C and E) or unpaired t-test (G, I and J). PFS: progression-free survival.

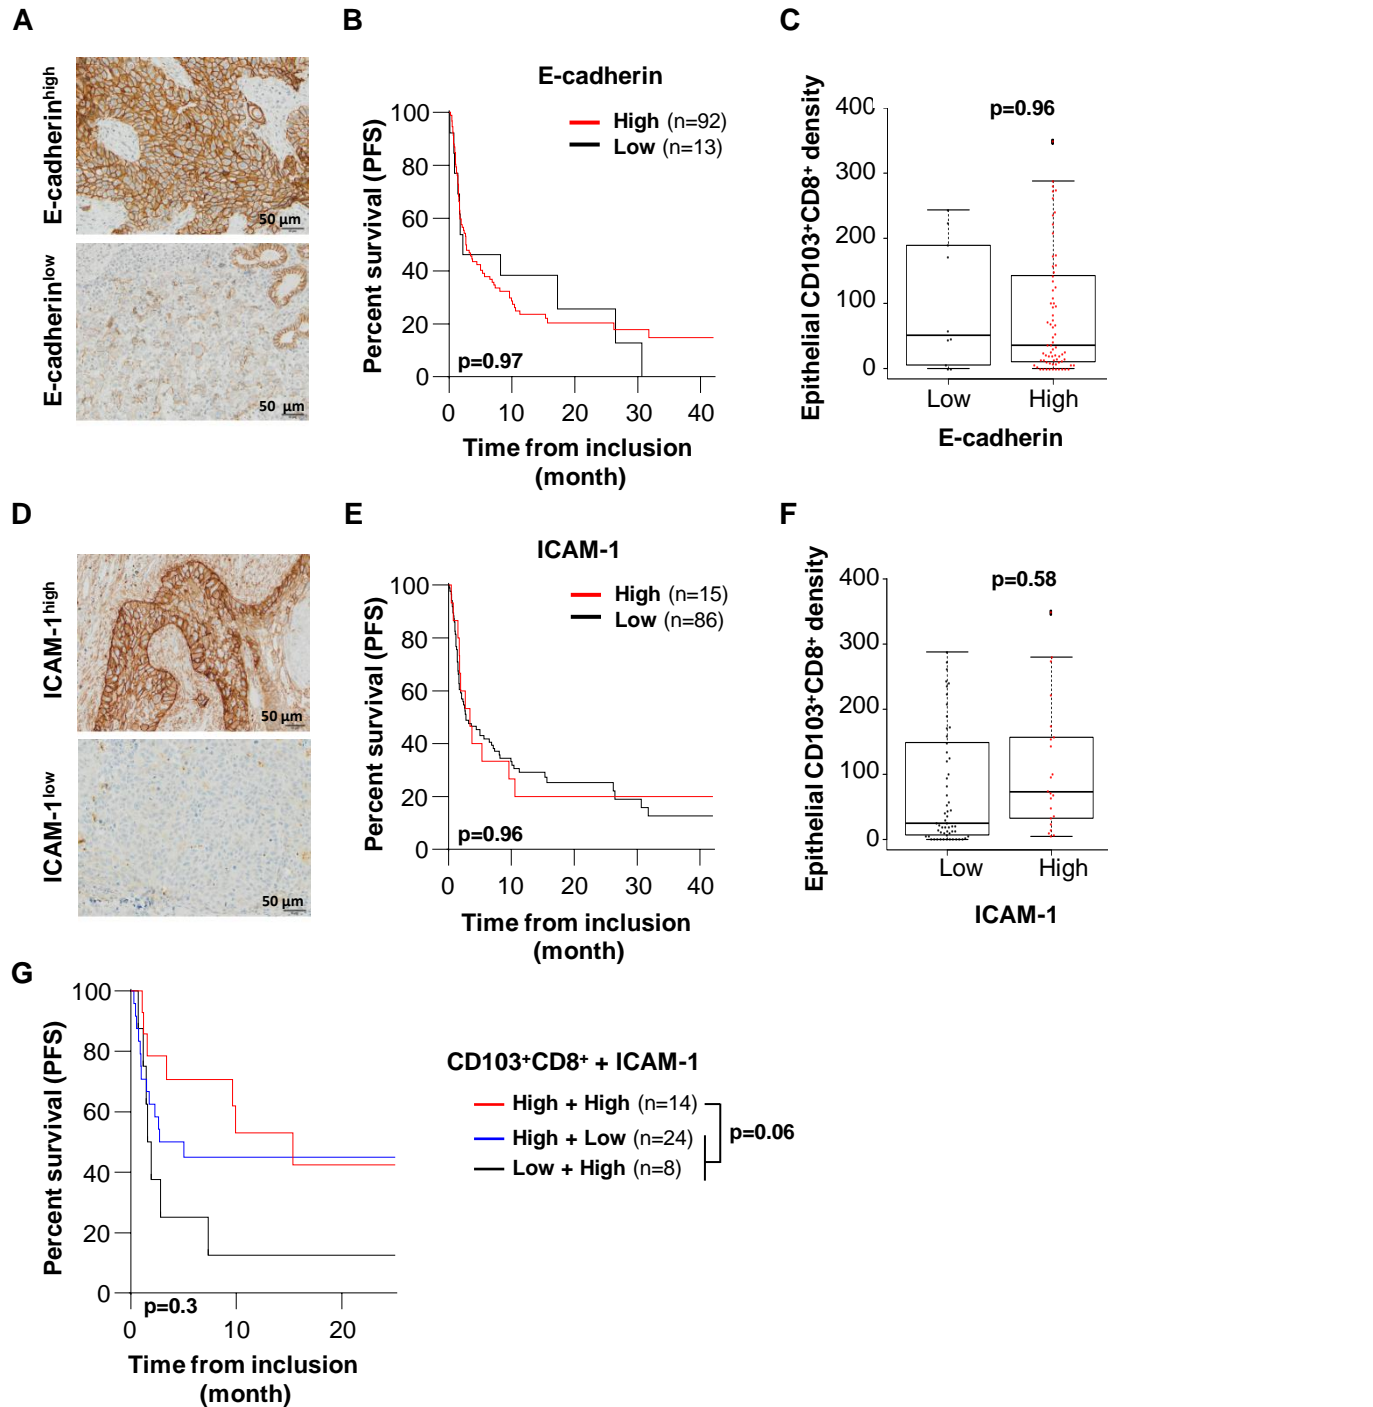

**Figure S2. E-cadherin and ICAM-1 expression on tumor cells and patient survival. (Related to Figure 1)**

(A) Representative images of positive and negative expression of E-cadherin by tumor cells. Scale bar 50 $\mu$ m (B) Kaplan-Meier curve shows iPFS of PD-1 blockade-treated patients with tumors harboring high and low expression of E-cadherin (n=105). (C) Density of CD103<sup>+</sup>CD8<sup>+</sup> cells in epithelial tumor regions depending on E-cadherin expression on tumor cells (low, n=13; high, n=92). (D) Representative images of high and low expression of ICAM-1 on tumor cells. Scale bar 50 $\mu$ m (E) Kaplan-Meier curve shows iPFS of anti-PD-1-treated patients with tumors harboring high or low expression of ICAM-1 (n=101). (F) Density of CD103<sup>+</sup>CD8<sup>+</sup> cells in epithelial tumor regions depending on ICAM-1 expression on tumor cells (low, n=86; high, n=15). (G) Kaplan-Meier curve shows iPFS of anti-PD-1-treated patients with epithelial tumor regions harboring high CD103<sup>+</sup>CD8<sup>+</sup> infiltration and high ICAM-1 expression (red) or high CD103<sup>+</sup>CD8<sup>+</sup> infiltration and weak expression of ICAM-1 (blue) or low CD103<sup>+</sup>CD8<sup>+</sup> infiltration and high ICAM-1 expression (n=84). p-value was determined by log-rank test (B, E and G) or Chi2 test (C and F). The number of analyzed samples for each patient group is shown in parentheses.

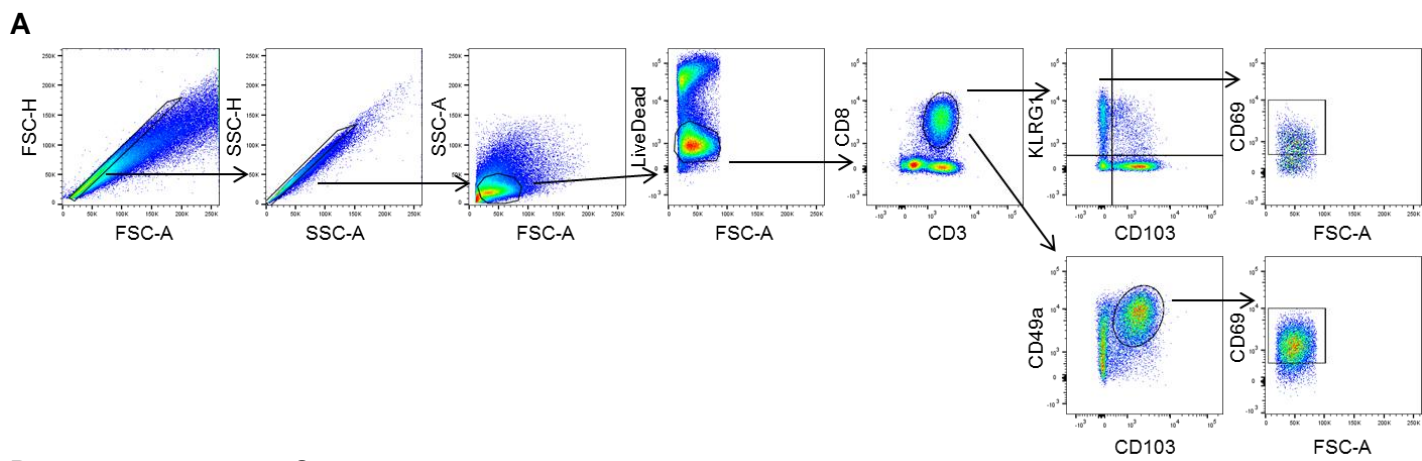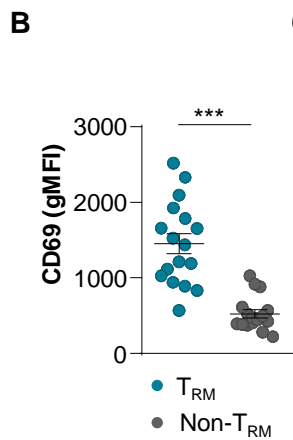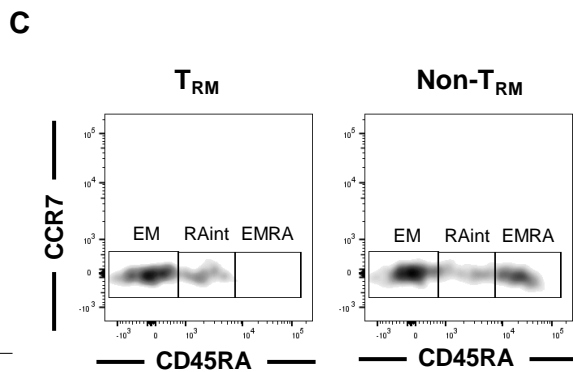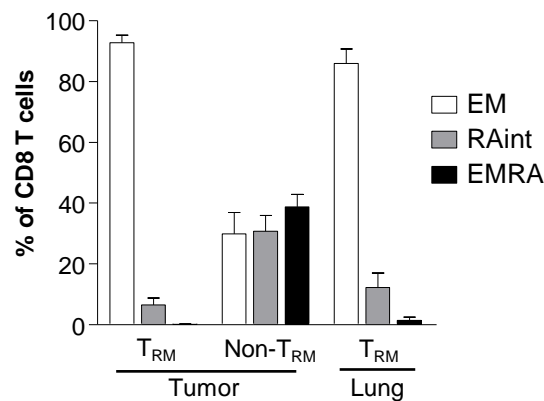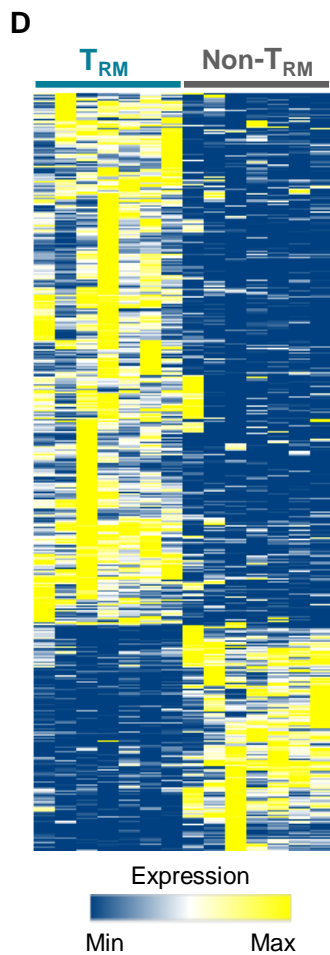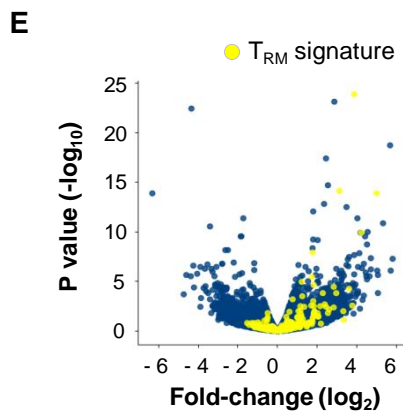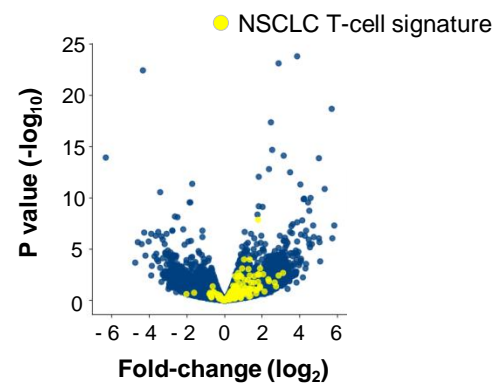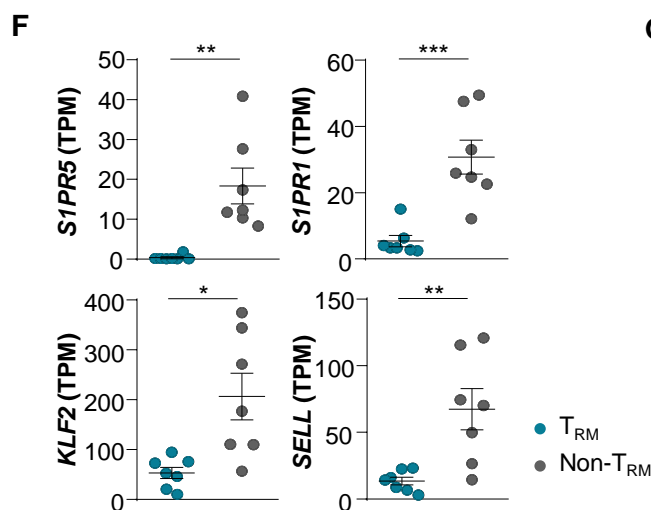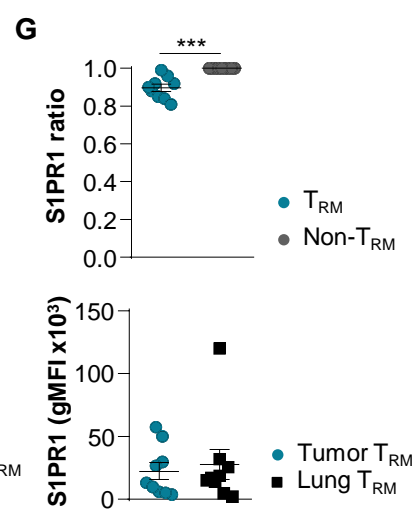

**Figure S3. Expression of T<sub>RM</sub> markers on CD8<sup>+</sup> TIL and transcriptional profiles of CD103<sup>+</sup> (T<sub>RM</sub>) and KLRG1<sup>+</sup> (non-T<sub>RM</sub>) CD8<sup>+</sup> T cells. (Related to Figures 2 and 3)**

(A) Gating strategy for analysis of KLRG1, CD103, CD49a and CD69 by CD3<sup>+</sup>CD8<sup>+</sup> TIL. (B) Expression of CD69 on tumor T<sub>RM</sub> and non-T<sub>RM</sub> (gMFI). (C) Dot plot showing expression of CCR7 and CD45RA on T<sub>RM</sub> and non-T<sub>RM</sub> from one representative NSCLC patient. Right, percentages of effector memory (EM), effector memory CD45RA intermediate (RAint) and effector memory CD45RA<sup>+</sup> (EMRA) cells among T<sub>RM</sub> and non-T<sub>RM</sub> from tumor and paired T<sub>RM</sub> from healthy lung (n=6). (D) Heat map of transcripts differentially expressed in paired CD103<sup>+</sup> and KLRG1<sup>+</sup> CD8<sup>+</sup> TIL (n=7). Genes of interest (n=500) were selected using fold-change (FC) ≥2 and p-value ≤0.05. Data were bi-clustered by transcript using Pearson's coefficient as the distance metric. The magnitude of relative expression of a particular transcript is shown in color. Each column represents an individual patient. (E) Differential gene expression profiles in CD103<sup>+</sup> and paired KLRG1<sup>+</sup> CD8 T cells. T<sub>RM</sub> up-gene signature: all transcripts (blue), upregulated gene sets related to T<sub>RM</sub> (yellow)<sup>13</sup>. Right, differential expression of NSCLC T-cell signature genes in tumor T<sub>RM</sub> and paired non-T<sub>RM</sub> (n=7). All transcripts (blue) and upregulated genes related to NSCLC T-cell signature<sup>18</sup> (yellow) are included. (F) Expression of *SIPR5*, *SIPR1*, *KLF2* and *SELL* genes in CD103<sup>+</sup> and paired KLRG1<sup>+</sup> CD8 T cells (n=7). Transcripts per million (TPM) are shown. (G) Ratio/non-T<sub>RM</sub>) of geometric mean fluorescence intensity (gMFI) of S1pr1 in paired samples of tumor T<sub>RM</sub> and non-T<sub>RM</sub> (n=9). Down, expression of S1pr1 (gMFI) in T<sub>RM</sub> cells from tumors or paired healthy lung tissues. Histograms represent mean ± SEM. \* P<0.05, \*\* P<0.01, \*\*\* P<0.001 (paired t-test).

**A**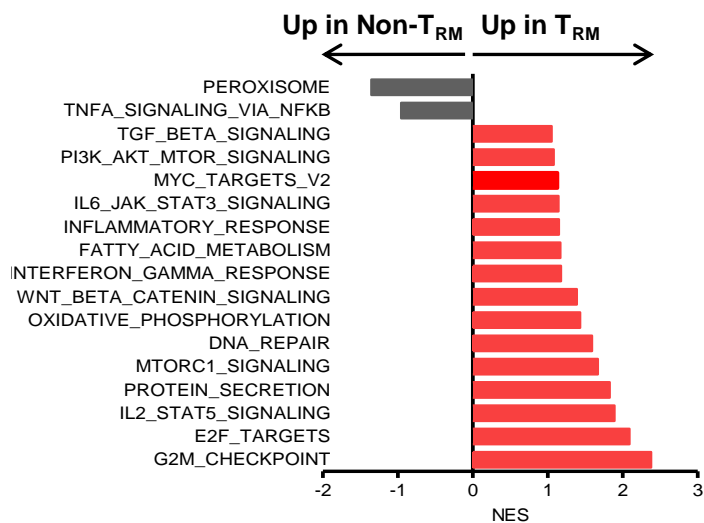**B**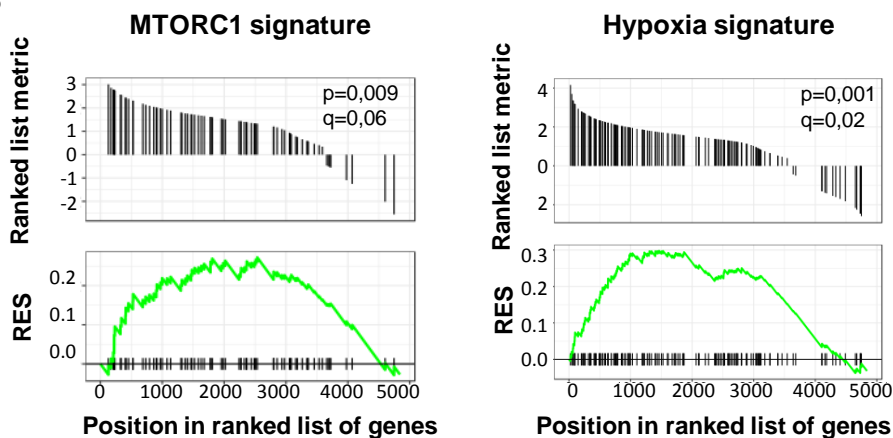**C**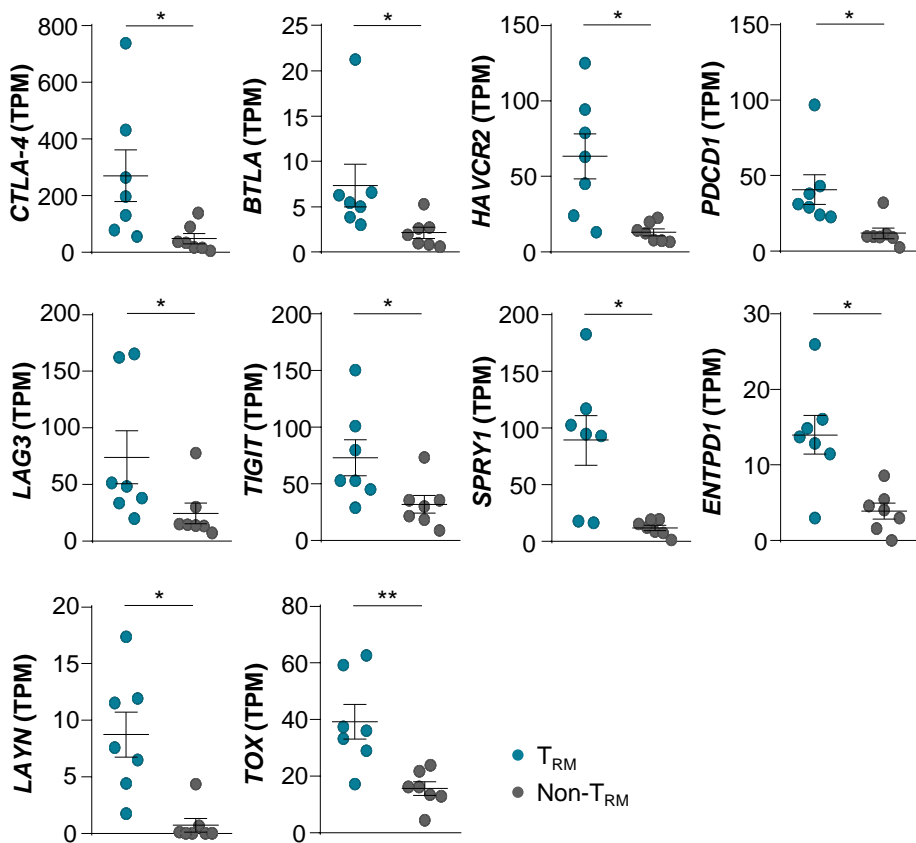**D**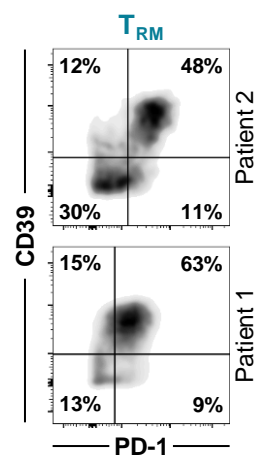

**Figure S4. Transcriptional and phenotypic profiles of CD8<sup>+</sup> T<sub>RM</sub> and non-T<sub>RM</sub>. (Related to Figure 3)**

(A) Gene set enrichment analysis (GSEA) of paired tumor T<sub>RM</sub> and non-T<sub>RM</sub> cells showing hallmark gene sets enriched in T<sub>RM</sub> subset. Normalized enrichment scores (*NES*) are shown. (B) GSEA of mTORC1 (left) signature genes (Gene set M5924) and GSEA of hypoxia (right) signature genes (Gene set M48562) upregulated in the transcriptome of tumor T<sub>RM</sub> relative to non-T<sub>RM</sub>. Running enrichment score (RES) for gene set, as analysis ‘walks down’ ranked list of genes; position of the gene set members (black vertical lines) in ranked list of genes and value of ranking metric are shown. (C) Expression of *CTLA4*, *BTLA*, *HAVCR2*, *PDCD1*, *LAG3*, *TIGIT*, *SPRY1*, *ENTPD1*, *LAYN* and *TOX* genes in CD103<sup>+</sup> and KLRG1<sup>+</sup> CD8<sup>+</sup> TIL. Values are TPM. (D) Representative dot plots of co-expression of CD39 and PD-1 on T<sub>RM</sub> from two NSCLC patients (patients 1 and 2). Horizontal lines are mean ± SEM. \* P<0.05, \*\* P<0.01 (paired t-test).



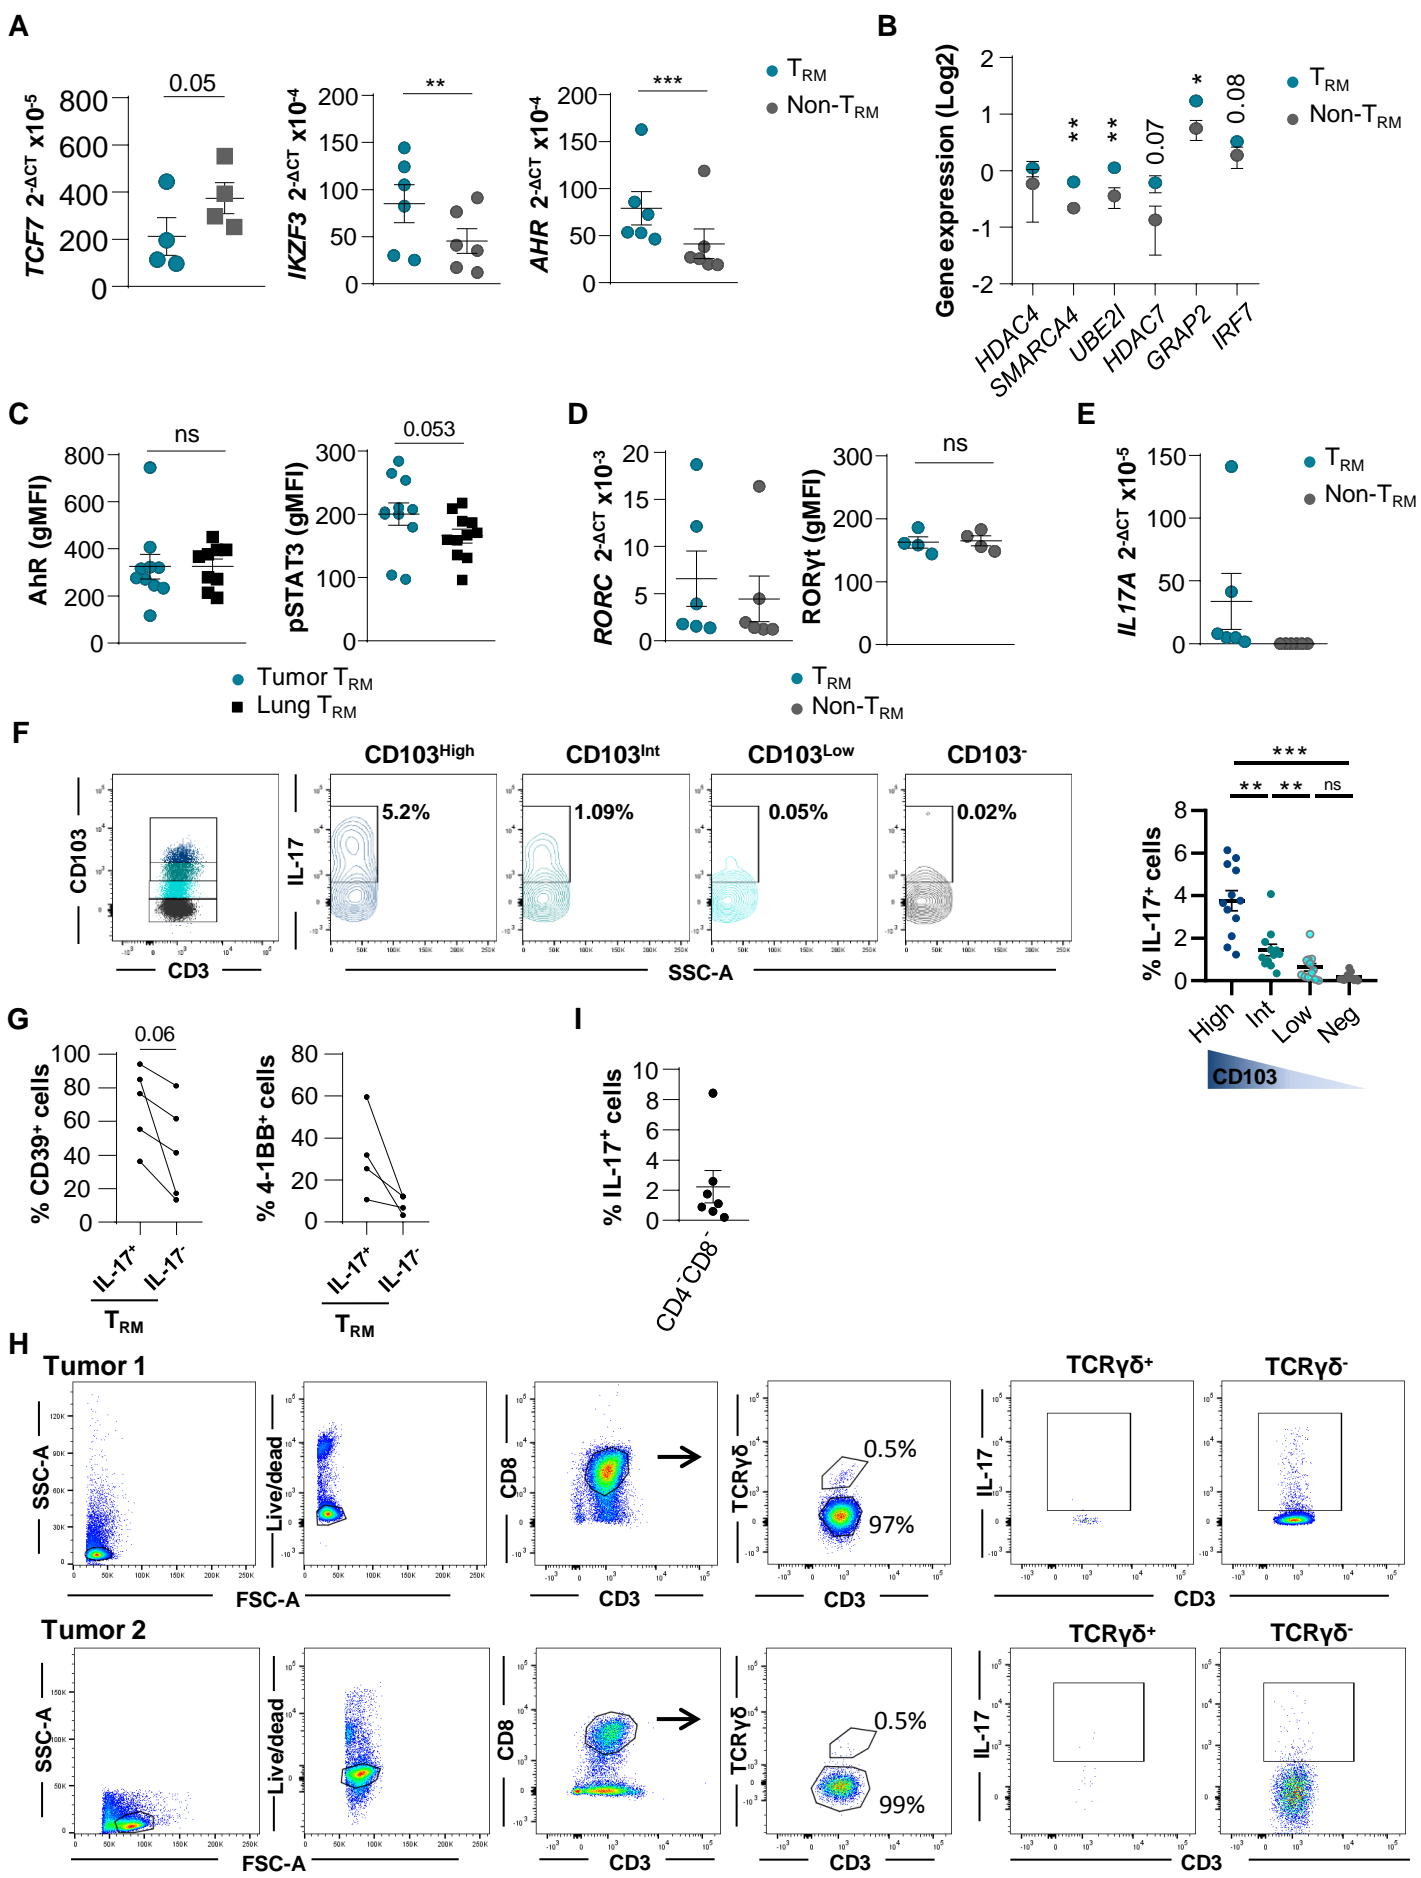

**Figure S5. Lung tumor CD103<sup>+</sup>CD8<sup>+</sup> T<sub>RM</sub> display a Tc17-polarized pattern. (Related to Figures 4 and 5)**

(A) *TCF7* (left), *IKZF3* (middle) and *AHR* (right) gene expression in T<sub>RM</sub> and paired non-T<sub>RM</sub> cells determined by RT-qPCR (n=4-6). Delta-CT values are shown. (B) Expression of genes involved in the Aiolos pathway in tumor T<sub>RM</sub> and paired non-T<sub>RM</sub> (n=7). Mean ± SEM of gene expression (Log2) are shown. (C) Expression (gMFI) of AhR (left) or pSTAT3 (right) in T<sub>RM</sub> cells from tumor and paired healthy lung tissues (n=10). (D) Left, *RORC* gene expression (Delta-CT values) determined by RT-qPCR (n=6) and right, expression (gMFI) of RORγt in tumor T<sub>RM</sub> and paired non-T<sub>RM</sub> (n=4). (E) *IL17A* gene expression in tumor T<sub>RM</sub> and paired non-T<sub>RM</sub> determined by RT-qPCR (n=6). Delta-CT values are shown. (F) Dot plots of IL-17 expression in CD103<sup>+</sup>CD8<sup>+</sup> TIL displaying CD103<sup>high</sup>, CD103<sup>int</sup> and CD103<sup>low</sup> phenotype, and CD103<sup>-</sup>CD8<sup>+</sup> TIL from one representative tumor. Right, percentages of IL-17-producing cells among CD103<sup>high</sup>, CD103<sup>int</sup>, CD103<sup>low</sup> and CD103<sup>-</sup> TIL (n=12). (G) Percentages of CD39<sup>+</sup> (n=5) and 4-1BB<sup>+</sup> (n=4) cells among IL17-producing (IL-17<sup>+</sup>) and IL17-non-producing (IL-17<sup>-</sup>) CD103<sup>+</sup>CD8<sup>+</sup> T cells from NSCLC tumors. (H) Dot plots of TCRγδ expression on CD3<sup>+</sup>CD8<sup>+</sup> TIL from two representative tumors. Right, IL-17 production by TCRγδ<sup>+</sup> and TCRγδ<sup>-</sup> CD8<sup>+</sup> T cells stimulated 3h with PMA plus ionomycin. Two representative tumor samples are shown. (I). Percentages of IL-17<sup>+</sup> cells among CD8<sup>-</sup>CD4<sup>-</sup> T cells from NSCLC tumors after 4h stimulation with PMA/ionomycin (n=7). Each symbol represents one individual patient, horizontal lines are the mean ± SEM. \* P<0.05 \*\* P<0.01, \*\*\* P<0.001 (paired t-test, A, B, C, and G or ANOVA with Bonferroni post-hoc test, F).

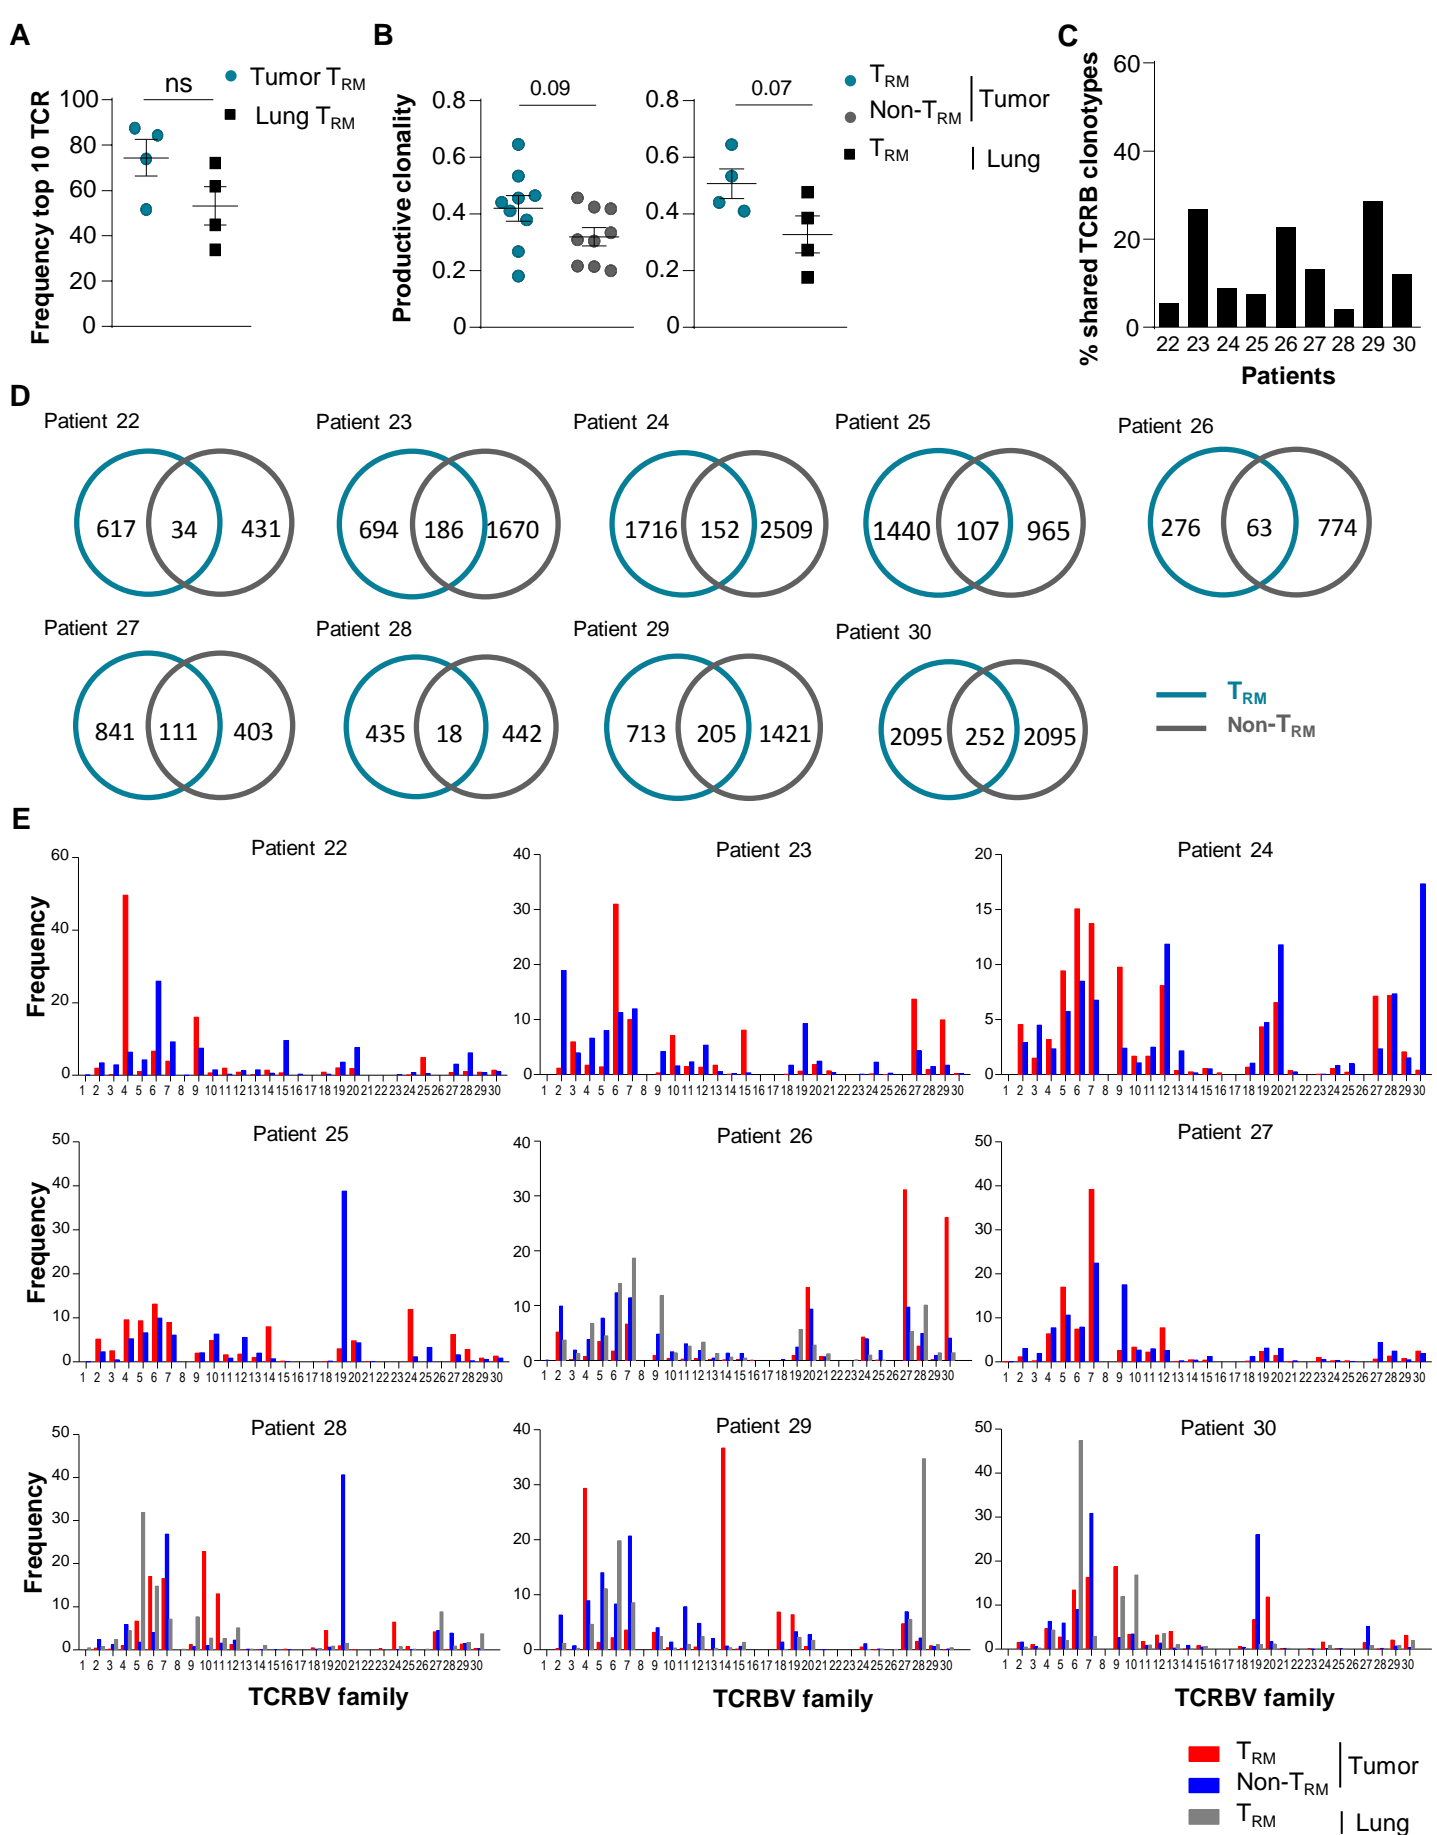

**Figure S6. Tumor CD103<sup>+</sup>CD8<sup>+</sup> T<sub>RM</sub> displays a more oligoclonal TCR repertoire than non-T<sub>RM</sub> counterparts. (Related to Figure 7)**

(A) Frequency of the top ten TCR sequences in T<sub>RM</sub> from tumors and healthy lung counterparts (n=4). (B) Productive clonality of tumor T<sub>RM</sub> and paired non-T<sub>RM</sub> (n=9). Right, productive clonality of T<sub>RM</sub> from tumors and healthy lung tissues (n=4). Each symbol represents one individual patient; horizontal lines are the mean ± SEM. p-values are calculated with paired t-test. (C) Percentages of shared TCRβ clonotypes between tumor T<sub>RM</sub> and non-T<sub>RM</sub> in each patient (n=9). (D) Number of individual and overlap sequence diversities of TCRβ CDR3 repertoires from tumor T<sub>RM</sub> and paired non-T<sub>RM</sub> (n=9). (E) Histograms represent productive frequencies of the 30 TCRBV gene segments for tumor T<sub>RM</sub> and paired non-T<sub>RM</sub> (n=9), and paired healthy lung T<sub>RM</sub> (n=4).

**Table S1: Population description and IHC data of the discovery cohort (Related to Figure 1)**

| Population description                                                        |                      | Overall population<br>(n=86) | Density CD103 <sup>+</sup> CD8 <sup>+</sup> low<br>(n=67) | Density CD103 <sup>+</sup> CD8 <sup>+</sup> high<br>(n=19) | p-value      |
|-------------------------------------------------------------------------------|----------------------|------------------------------|-----------------------------------------------------------|------------------------------------------------------------|--------------|
| Age                                                                           | Median, range        | 63 (30-84)                   | 63 (30-84)                                                | 63 (43-73)                                                 | 0.98         |
| Gender                                                                        | Female               | 27 (32%)                     | 20 (31%)                                                  | 7 (37%)                                                    | 0.62         |
|                                                                               | Male                 | 57 (68%)                     | 45 (69%)                                                  | 12 (63%)                                                   |              |
| Smoking status                                                                | Current              | 28 (33%)                     | 22 (34%)                                                  | 6 (32%)                                                    | 0.75         |
|                                                                               | Former               | 47 (56%)                     | 35 (54%)                                                  | 12 (63%)                                                   |              |
|                                                                               | Non-smoker           | 9 (11%)                      | 8 (12%)                                                   | 1 (5%)                                                     |              |
| Histology                                                                     | Adenocarcinoma       | 51 (61%)                     | 41 (63%)                                                  | 10 (53%)                                                   | 0.65         |
|                                                                               | NSCLC, other         | 6 (7%)                       | 5(8%)                                                     | 1 (5%)                                                     |              |
|                                                                               | Squamous             | 27 (32%)                     | 19 (29%)                                                  | 8 (42%)                                                    |              |
| Stage at diagnosis                                                            | I-IIIa               | 29 (35%)                     | 21 (32%)                                                  | 8 (44%)                                                    | 0.34         |
|                                                                               | IIIB                 | 14 (17%)                     | 11 (17%)                                                  | 3 (17%)                                                    |              |
|                                                                               | IVA- IVB             | 40 (48%)                     | 33 (51%)                                                  | 7 (39%)                                                    |              |
|                                                                               | NA                   | 0                            | 0                                                         | 0                                                          |              |
| Molecular status                                                              | <i>EGFR</i> mutation | 5 (6%)                       | 4 (6%)                                                    | 1 (5%)                                                     | 0.81         |
|                                                                               | <i>ALK</i> fusion    | 1 (1%)                       | 1 (2%)                                                    | 0                                                          | 0.42         |
|                                                                               | <i>KRAS</i> mutation | 19 (23%)                     | 14 (22%)                                                  | 5 (26%)                                                    | 0.58         |
|                                                                               | <i>BRAF</i> mutation | 2 (2%)                       | 2 (3%)                                                    | 0                                                          | 0.87         |
| Previous therapies                                                            | Platinum-based chemo | 33 (41%)                     | 25 (40%)                                                  | 8 (44%)                                                    | 0.037        |
|                                                                               | Second-line chemo    | 14 (17%)                     | 14 (11%)                                                  | 4 (22%)                                                    |              |
|                                                                               | Other therapies      | 17 (21%)                     | 17 (27%)                                                  | 4 (22%)                                                    |              |
|                                                                               | No prior therapy     | 6 (7%)                       | 5 (8%)                                                    | 1 (6%)                                                     |              |
|                                                                               | Chemo-radiation      | 11 (14%)                     | 6 (10%)                                                   | 5 (28%)                                                    |              |
| Line of immunotherapy                                                         | ≤ 2                  | 45 (54%)                     | 32 (49%)                                                  | 13 (68%)                                                   | 0.14         |
|                                                                               | > 2                  | 39 (46%)                     | 33 (51%)                                                  | 6 (32%)                                                    |              |
| Number of metastatic sites                                                    | ≤ 2                  | 46 (55%)                     | 35 (54%)                                                  | 11 (58%)                                                   | 0.75         |
|                                                                               | > 2                  | 38 (45%)                     | 30 (46%)                                                  | 8 (42%)                                                    |              |
|                                                                               | NA                   | 2                            | 2                                                         | 0                                                          |              |
| Type of immunotherapy                                                         | PD-1 inhibitor       | 69 (82%)                     | 54 (83%)                                                  | 15 (79%)                                                   | 0.74         |
|                                                                               | PD-L1 inhibitor      | 15 (18%)                     | 11 (17%)                                                  | 4 (21%)                                                    |              |
| Performance status                                                            | 0-1                  | 68 (82%)                     | 50 (78%)                                                  | 18 (95%)                                                   | 0.17         |
|                                                                               | ≥ 2                  | 15 (18%)                     | 14 (22%)                                                  | 1 (5%)                                                     |              |
|                                                                               | NA                   | 3                            | 3                                                         | 0                                                          |              |
| Response rate                                                                 | Complete response    | 2 (3%)                       | 1 (2%)                                                    | 1 (6%)                                                     | <b>0.024</b> |
|                                                                               | Partial response     | 15 (18%)                     | 8 (13%)                                                   | 7 (39%)                                                    |              |
|                                                                               | Stable disease       | 28 (34%)                     | 22 (34%)                                                  | 6 (33%)                                                    |              |
|                                                                               | Progressive disease  | 37 (45%)                     | 33 (51%)                                                  | 4 (22%)                                                    |              |
|                                                                               | NA                   | 4                            | 3                                                         | 1                                                          |              |
| Objective response rate                                                       | CR + PR              | 17 (21%)                     | 9 (14%)                                                   | 8 (44%)                                                    | <b>0.005</b> |
| NA                                                                            | 4                    | 3                            | 1                                                         |                                                            |              |
| ICAM-1 expression                                                             | Median, range        | 80 (0-300)                   | 70 (0-300)                                                | 140 (0-300)                                                | 0.23         |
|                                                                               | NA                   | 3                            | 3                                                         | 0                                                          |              |
| ICAM-1 expression by category                                                 | Low                  | 61 (73%)                     | 49 (77%)                                                  | 12 (63%)                                                   | 0.25         |
|                                                                               | High                 | 22 (27%)                     | 15 (23%)                                                  | 7 (37%)                                                    |              |
|                                                                               | NA                   | 0                            | 0                                                         | 0                                                          |              |
| E-Cadherin expression by category                                             | 0-1                  | 10 (12%)                     | 7 (11%)                                                   | 3 (16%)                                                    | 0.73         |
|                                                                               | 2-3                  | 74 (88%)                     | 58 (89%)                                                  | 16 (84%)                                                   |              |
|                                                                               | NA                   | 2                            | 2                                                         | 0                                                          |              |
| PD-L1 expression                                                              | Median, range        | 28 (0-100)                   | 10 (0-95)                                                 | 80 (10-100)                                                | 0.023        |
|                                                                               | NA                   | 46                           | 36                                                        | 10                                                         |              |
| Epithelial CD8 <sup>+</sup> density                                           | Low                  | 59 (69%)                     | 57 (85%)                                                  | 2 (11%)                                                    | <0.001       |
|                                                                               | High                 | 27 (31%)                     | 10 (15%)                                                  | 17 (89%)                                                   |              |
| Density stromal CD8 <sup>+</sup>                                              | Low                  | 60 (71%)                     | 60 (90%)                                                  | 0                                                          | <0.001       |
|                                                                               | High                 | 24 (29%)                     | 7 (10%)                                                   | 17 (100%)                                                  |              |
|                                                                               | NA                   | 2                            | 0                                                         | 2                                                          |              |
| Total CD8 <sup>+</sup> density                                                | Low                  | 62 (72%)                     | 61 (91%)                                                  | 1 (5%)                                                     | <0.001       |
|                                                                               | High                 | 24 (28%)                     | 6 (9%)                                                    | 18 (95%)                                                   |              |
| Epithelial CD103 <sup>+</sup> CD8 <sup>+</sup> density                        | Low                  | 45 (52%)                     | 44 (66%)                                                  | 1 (5%)                                                     | <0.001       |
|                                                                               | High                 | 41 (48%)                     | 23 (34%)                                                  | 18 (95%)                                                   |              |
| Stromal CD103 <sup>+</sup> CD8 <sup>+</sup> density                           | Low                  | 61 (71%)                     | 60 (90%)                                                  | 1 (5%)                                                     | <0.001       |
|                                                                               | High                 | 25 (29%)                     | 7 (10%)                                                   | 18 (95%)                                                   |              |
| Total CD103 <sup>+</sup> CD8 <sup>+</sup> density                             | Low                  | 67 (78%)                     | 67 (100%)                                                 | 0                                                          | <0.001       |
|                                                                               | High                 | 19 (22%)                     | 0                                                         | 19 (100%)                                                  |              |
| Epithelial CD103 <sup>+</sup> CD8 <sup>+</sup> density                        | Low                  | 41 (48%)                     | 36 (54%)                                                  | 5 (26%)                                                    | 0.01         |
|                                                                               | High                 | 45 (52%)                     | 31 (46%)                                                  | 14 (74%)                                                   |              |
| Stromal CD103 <sup>+</sup> CD8 <sup>+</sup> density                           | Low                  | 50 (58%)                     | 48 (72%)                                                  | 2 (11%)                                                    | 0.001        |
|                                                                               | High                 | 36 (42%)                     | 19 (28%)                                                  | 17 (89%)                                                   |              |
| Total CD103 <sup>+</sup> CD8 <sup>+</sup> density                             | Low                  | 70 (81%)                     | 62 (93%)                                                  | 8 (42%)                                                    | 0.001        |
|                                                                               | High                 | 16 (19%)                     | 5 (7%)                                                    | 11 (58%)                                                   |              |
| Total CD103 <sup>+</sup> CD8 <sup>+</sup> density (number)                    |                      | 102.59 (0;1320.75)           | 65.96 (0;246.8)                                           | 466.21 (252.42;1320.75)                                    | <0.001       |
| Epithelial CD103 <sup>+</sup> CD8 <sup>+</sup> density (number)               |                      | 44.56 (0;603.82)             | 21.56 (0;262.13)                                          | 240.23 (48.14;603.82)                                      | <0.001       |
| Stromal CD103 <sup>+</sup> CD8 <sup>+</sup> density (number)                  |                      | 152.75 (0;2477.96)           | 93.81 (0;478.15)                                          | 678.6 (283.59;2477.96)                                     | <0.001       |
| Percentage of CD103 <sup>+</sup> among CD8 <sup>+</sup> in epithelial regions |                      | 76.19 (0;100)                | 67.48 (0;100)                                             | 83.33 (29.87;100)                                          | 0.001        |
| Percentage of CD103 <sup>+</sup> among CD8 <sup>+</sup> in stromal regions    |                      | 47.62 (0;94.44)              | 42.6 (0;94.44)                                            | 58.61 (26.47;87.69)                                        | 0.046        |

NA: not available; CR: complete response; PR: partial response.

**Table S2: Immunotherapy progression-free survival (iPFS) median (Discovery cohort) (Related to Figure 1)**

| Variables                                                       |              |      | Total patient number | Percentage (%) | Events number | Median (95%CI) (month) | Log-rank p-value |
|-----------------------------------------------------------------|--------------|------|----------------------|----------------|---------------|------------------------|------------------|
|                                                                 |              |      | 84                   | 100            | 62            | 2.69 (1.74-7.13)       |                  |
| CD8 <sup>+</sup> cells                                          | Total        | Low  | 60                   | 71.4           | 51            | 2.05 (1.51-5.03)       | 0.005            |
|                                                                 |              | High | 24                   | 28.6           | 11            | 9.92 (2.73-NR)         |                  |
|                                                                 | Stromal      | Low  | 58                   | 69             | 50            | 2.05 (1.51-5.03)       | 0.001            |
|                                                                 |              | High | 24                   | 28.6           | 11            | 30.62 (3.42-NR)        |                  |
|                                                                 | Epithelial   | Low  | 58                   | 69             | 48            | 2.22 (1.64-4.99)       | 0.03             |
|                                                                 |              | High | 26                   | 31             | 14            | 9.92 (1.74-NR)         |                  |
| CD103 <sup>+</sup> CD8 <sup>+</sup> cells                       | Total        | Low  | 65                   | 77.4           | 54            | 2.3 (1.68-5.03)        | 0.008            |
|                                                                 |              | High | 19                   | 22.6           | 8             | 30.6 (2.73-NR)         |                  |
|                                                                 | Stromal      | Low  | 59                   | 70.2           | 50            | 2.14 (1.51 -5.03)      | 0.006            |
|                                                                 |              | High | 25                   | 29.8           | 12            | 30.62 (2.30-NR)        |                  |
|                                                                 | Epithelial   | Low  | 44                   | 52.4           | 37            | 1.76 (1.48-4.99)       | 0.01             |
|                                                                 |              | High | 40                   | 47.6           | 25            | 9.63 (2.56-NR)         |                  |
| CD103 <sup>-</sup> CD8 <sup>+</sup> cells                       | Total        | Low  | 68                   | 81             | 55            | 2.5 (1.68-6.54)        | 0.02             |
|                                                                 |              | High | 16                   | 19             | 7             | NR (1.58-NR)           |                  |
|                                                                 | Stromal      | Low  | 49                   | 58.3           | 43            | 2.14 (1.64-5.03)       | 0.001            |
|                                                                 |              | High | 35                   | 41.7           | 19            | 9.92 (1.81-NR)         |                  |
|                                                                 | Epithelial   | Low  | 41                   | 48.8           | 27            | 6.90 (2.76-26.22)      | 0.03             |
|                                                                 |              | High | 43                   | 51.2           | 35            | 1.68 (1.31-3.42)       |                  |
| CD103/CD8 score                                                 | Good         |      | 12                   | 14.3           | 5             | 26.22 (15.34-NR)       | <0.0001          |
|                                                                 | Intermediate |      | 57                   | 67.9           | 42            | 2.76 (1.70-7.33)       |                  |
|                                                                 | Poor         |      | 15                   | 17.9           | 15            | 1.38 (0.72-1.97)       |                  |
| ICAM-1                                                          | Low          |      | 86                   | 85.1           | 66            | 2.79 (1.97-7.33)       | 0.96             |
|                                                                 | High         |      | 15                   | 14.9           | 12            | 3.42 (1.81-NR)         |                  |
| E-cadherin                                                      | Low          |      | 13                   | 12.4           | 11            | 2.23 (1.41-NR)         | 0.97             |
|                                                                 | High         |      | 92                   | 87.6           | 73            | 2.74 (1.94-5.68)       |                  |
| Epithelial CD103 <sup>+</sup> CD8 <sup>+</sup> cells and ICAM-1 | High/High    |      | 14                   | 16.6           | 8             | 15.34                  | 0.3              |
|                                                                 | High/Low     |      | 24                   | 28.5           | 15            | 3.87                   |                  |
|                                                                 | Low/High     |      | 8                    | 9.5            | 7             | 1.75                   |                  |

NR: not reached, CI: confidence interval

**Table S3: Multivariate analysis for progression-free survival (Discovery cohort) (Related to Figure 1)**

| <b>Variables</b>                                 | <b>HR (95% CI)</b>      | <b>p-value</b> |
|--------------------------------------------------|-------------------------|----------------|
| Age $\geq$ 65                                    | 1.79 (0.73-4.37)        | 0.20           |
| Histology squamous                               | 1.5 (0.83-2.73)         | 0.18           |
| Smoker                                           | 0.35 (0.14-0.84)        | 0.02           |
| Performance status $\geq$ 2                      | 1.12 (0.57-2.21)        | 0.73           |
| Number of metastatic sites                       | 1.83 (1.02-3.29)        | 0.04           |
| High CD103 <sup>+</sup> CD8 <sup>+</sup> density | <b>0.39 (0.18-0.85)</b> | 0.02           |

HR: hazard ratio; CI: confidence interval.

**Table S4: Population description and immunohistochemistry data of the validation cohort (Related to Figure 1)**

| Population description                                          |                      | Overall population (n=41) |
|-----------------------------------------------------------------|----------------------|---------------------------|
| Age                                                             | Median, range        | 64 (42-85)                |
| Gender                                                          | Female               | 20 (49%)                  |
|                                                                 | Male                 | 21 (51%)                  |
| Smoking status                                                  | Current              | 18 (44%)                  |
|                                                                 | Former               | 19 (46%)                  |
|                                                                 | Non-smoker           | 4 (10%)                   |
| Histology                                                       | Adenocarcinoma       | 34 (83%)                  |
|                                                                 | NSCLC, others        | 1 (2.5%)                  |
|                                                                 | Squamous             | 6 (14.5%)                 |
| Stage at diagnosis                                              | IIA                  | 2 (5%)                    |
|                                                                 | IIB                  | 1 (2.5%)                  |
|                                                                 | IIIA                 | 3 (7%)                    |
|                                                                 | IIIB                 | 2 (5%)                    |
|                                                                 | IVA                  | 7 (17%)                   |
|                                                                 | IVB                  | 26 (63.5%)                |
| Molecular status                                                | <i>EGFR</i> mutation | 2 (5%)                    |
|                                                                 | <i>ALK</i> fusion    | 2 (5%)                    |
|                                                                 | <i>KRAS</i> mutation | 16 (42%)                  |
|                                                                 | <i>BRAF</i> mutation | 2 (5%)                    |
| Line of immunotherapy                                           | ≤ 2                  | 33 (80%)                  |
|                                                                 | > 2                  | 8 (20%)                   |
| Number of metastatic sites                                      | ≤ 2                  | 12 (29%)                  |
|                                                                 | > 2                  | 29 (71%)                  |
| Type of immunotherapy                                           | PD-1 inhibitor       | 41 (100%)                 |
| Performance status                                              | 0-1                  | 26 (63%)                  |
|                                                                 | ≥ 2                  | 15 (37%)                  |
| Response rate                                                   | Complete response    | 2 (5%)                    |
|                                                                 | Partial response     | 8 (20%)                   |
|                                                                 | Stable disease       | 10 (26%)                  |
|                                                                 | Progressive disease  | 19 (49%)                  |
|                                                                 | NA                   | 2                         |
| Objective response rate                                         | CR + PR              | 10 (26%)                  |
|                                                                 | NA                   | 2                         |
| PD-L1 expression                                                | Median, range        | 10 (0-100)                |
| Epithelial CD8 <sup>+</sup> density                             | Low                  | 21 (51%)                  |
|                                                                 | High                 | 20 (49%)                  |
| Stromal CD8 <sup>+</sup> density                                | Low                  | 26 (63%)                  |
|                                                                 | High                 | 15 (37%)                  |
| Total CD8 <sup>+</sup> density                                  | Low                  | 24 (59%)                  |
|                                                                 | High                 | 17 (41%)                  |
| Epithelial CD103 <sup>+</sup> CD8 <sup>+</sup> density          | Low                  | 21 (51%)                  |
|                                                                 | High                 | 20 (49%)                  |
| Stromal CD103 <sup>+</sup> CD8 <sup>+</sup> density             | Low                  | 34 (83%)                  |
|                                                                 | High                 | 7 (17%)                   |
| Total CD103 <sup>+</sup> CD8 <sup>+</sup> density               | Low                  | 36 (88%)                  |
|                                                                 | High                 | 5 (12%)                   |
| Epithelial CD103 <sup>-</sup> CD8 <sup>+</sup> density          | Low                  | 7 (17%)                   |
|                                                                 | High                 | 34 (83%)                  |
| Stromal CD103 <sup>-</sup> CD8 <sup>+</sup> density             | Low                  | 20 (49%)                  |
|                                                                 | High                 | 21 (51%)                  |
| Total CD103 <sup>-</sup> CD8 <sup>+</sup> density               | Low                  | 23 (56%)                  |
|                                                                 | High                 | 18 (44%)                  |
| Total CD103 <sup>+</sup> CD8 <sup>+</sup> density (number)      | Median (range)       | 120.4 (0;902.4)           |
| Epithelial CD103 <sup>+</sup> CD8 <sup>+</sup> density (number) | Median (range)       | 118 (0;789.85)            |
| Stromal CD103 <sup>+</sup> CD8 <sup>+</sup> density (number)    | Median (range)       | 150.95 (0;1147.28)        |

CR: complete response; PR: partial response; NA: not available



**Table S5: Patient characteristics and density of cells pre- and post-treatment (Related to Figure 1)**

| Group of patients | Patient N° | Number of ICB cycles | RECIST/Radiologic response (tumor volume reduction) | Responder/Non-responder | Stage diagnosis | OS (months) | Site of pre-biopsy | Site of post-biopsy | Days from last ICB to post-biopsy | Density of intra-epithelial CD103 <sup>+</sup> CD8 <sup>+</sup> cells |          | Density of total CD103 <sup>+</sup> CD8 <sup>+</sup> cells |          | Density of total CD8 <sup>+</sup> cells |          |
|-------------------|------------|----------------------|-----------------------------------------------------|-------------------------|-----------------|-------------|--------------------|---------------------|-----------------------------------|-----------------------------------------------------------------------|----------|------------------------------------------------------------|----------|-----------------------------------------|----------|
|                   |            |                      |                                                     |                         |                 |             |                    |                     |                                   | Pre-ICB                                                               | Post-ICB | Pre-ICB                                                    | Post-ICB | Pre-ICB                                 | Post-ICB |
| 1                 | 1          | 7                    | SD                                                  | R                       | IIIA            | 11.5        | Lung               | Lung                | 24                                | 161                                                                   | 682      | 204                                                        | 931      | 417                                     | 1779     |
|                   | 2          | NA                   | SD                                                  | R                       | IVB             | 13.9        | Lung               | Lung                | 135                               | 358                                                                   | 511      | 129                                                        | 518      | 493                                     | 1081     |
|                   | 3          | NA                   | SD                                                  | R                       | IVB             | 14.3        | Kidney meta        | Kidney meta         | 174                               | 162                                                                   | 134      | 173                                                        | 159      | 729                                     | 666      |
|                   | 4          | 1                    | PD                                                  | NR                      | IVA             | 2           | Lung               | Lung                | 14                                | 19                                                                    | 0        | 25                                                         | 0        | 58                                      | 30       |
|                   | 5          | NA                   | PD                                                  | NR                      | IIIA            | 18.4        | Lung               | Lung                | 34                                | 18                                                                    | 6        | 44                                                         | 21       | 221                                     | 600      |
| 2                 | 6          | 1                    | -17%                                                | R                       | NA              | 25.3        | Lung               | Lung                | 28                                | 172                                                                   | 555      | 159                                                        | 534      | 322                                     | 895      |
|                   | 7          | 1                    | -17%                                                | R                       | IIIA            | 31.5        | Lung               | Lung                | 27                                | 25                                                                    | 155      | 33                                                         | 155      | 135                                     | 342      |
|                   | 8          | 1                    | -5%                                                 | NR                      | IB              | 37.1        | Lung               | Lung                | 21                                | 230                                                                   | 133      | 258                                                        | 322      | 1691                                    | 1775     |
|                   | 9          | 1                    | 0%                                                  | NR                      | IIA             | 31.2        | Lung               | Lung                | 25                                | 267                                                                   | 95       | 208                                                        | 225      | 781                                     | 538      |

ICB: immune checkpoint blockade, OS : overall survival ; SD: stable disease; PD: progressive disease; R: responder; NR: non-responder; Meta: metastasis; NA: not available

**Table S6: Population description of ICAM and E-cadherin cohort (Discovery cohort) (Related to Figure 1)**

| Population description                   |                      | Overall population (N=111) |
|------------------------------------------|----------------------|----------------------------|
| <b>Age</b>                               | Median, range        | 63 (30-92)                 |
| <b>Gender</b>                            | Female               | 35 (32%)                   |
|                                          | Male                 | 76 (68%)                   |
| <b>Smoking status</b>                    | Current              | 36 (32%)                   |
|                                          | Former               | 64 (58%)                   |
|                                          | Non-smoker           | 11 (10%)                   |
| <b>Histology</b>                         | Adenocarcinoma       | 66 (60%)                   |
|                                          | NSCLC, other         | 16 (14%)                   |
|                                          | Squamous             | 29 (26%)                   |
| <b>Stage at diagnosis</b>                | I-III A              | 4 (4%)                     |
|                                          | III B                | 11 (10%)                   |
|                                          | IV A- IV B           | 95 (86%)                   |
|                                          | Missing              | 1                          |
| <b>Molecular status</b>                  | <i>EGFR</i> mutation | 5 (6%)                     |
|                                          | <i>ALK</i> fusion    | 2 (2%)                     |
|                                          | <i>KRAS</i> mutation | 24 (30%)                   |
|                                          | <i>BRAF</i> mutation | 3 (4%)                     |
| <b>Previous therapies</b>                | Platinum-based chemo | 55 (50%)                   |
|                                          | Second-line chemo    | 14 (13%)                   |
|                                          | Other therapies      | 22 (20%)                   |
|                                          | No prior therapy     | 6 (5%)                     |
|                                          | Chemo-radiation      | 13 (12%)                   |
| <b>Line of immunotherapy</b>             | ≤ 2                  | 64 (58%)                   |
|                                          | > 2                  | 47 (42%)                   |
| <b>Number of metastatic sites</b>        | ≤ 2                  | 54 (49%)                   |
|                                          | > 2                  | 57 (51%)                   |
|                                          | Missing              | 0                          |
| <b>Type of immunotherapy</b>             | PD-1 inhibitor       | 96 (86%)                   |
|                                          | PD-L1 inhibitor      | 15 (14%)                   |
| <b>Performance status</b>                | 0-1                  | 90 (82%)                   |
|                                          | ≥2                   | 20 (18%)                   |
|                                          | Missing              | 1                          |
| <b>Response rate</b>                     | Complete response    | 2 (2%)                     |
|                                          | Partial response     | 23 (22%)                   |
|                                          | Stable disease       | 38 (36%)                   |
|                                          | Progressive disease  | 44 (40%)                   |
|                                          | Missing              | 4                          |
| <b>Objective response rate</b>           | CR + PR              | 63 (58%)                   |
|                                          | Missing              | 3                          |
| <b>ICAM-1 expression</b>                 | Median range         | 80 (0-300)                 |
|                                          | Missing              | 10                         |
| <b>ICAM-1 expression by category</b>     | Low                  | 86 (85%)                   |
|                                          | High                 | 15 (15%)                   |
|                                          | Missing              | 10                         |
| <b>E-Cadherin expression by category</b> | 0-1                  | 13 (12%)                   |
|                                          | 2-3                  | 92 (88%)                   |
|                                          | Missing              | 6                          |

CR: complete response; PR: partial response.

**Table S7: Frequencies of T<sub>RM</sub> and non-T<sub>RM</sub> cells in lung tumors and autologous adjacent normal lung tissues (Related to Figure 2)**

| Patient | Lung tumor                                               |           |                    |           | Adjacent normal lung                                     |           |                    |           |
|---------|----------------------------------------------------------|-----------|--------------------|-----------|----------------------------------------------------------|-----------|--------------------|-----------|
|         | CD103 <sup>+</sup> CD49a <sup>+</sup> CD49a <sup>+</sup> |           | KLRG1 <sup>+</sup> |           | CD103 <sup>+</sup> CD49a <sup>+</sup> CD49a <sup>+</sup> |           | KLRG1 <sup>+</sup> |           |
|         | %                                                        | Number/mg | %                  | Number/mg | %                                                        | Number/mg | %                  | Number/mg |
| 1       | 55                                                       | 320       | 28                 | 164       | 56                                                       | 44        | 28                 | 22        |
| 2       | 52                                                       | 2340      | 31                 | 1271      | 31                                                       | 44        | 38                 | 47        |
| 3       | 44                                                       | 614       | 37                 | 515       | 8                                                        | 76        | 85                 | 845       |
| 4       | 27                                                       | 354       | 53                 | 706       | 25                                                       | 369       | 44                 | 656       |
| 5       | 36                                                       | 57        | 41                 | 67        | 7                                                        | 48        | 57                 | 394       |
| 6       | 37                                                       | 374       | 40                 | 401       | 28                                                       | 12        | 46                 | 20        |
| 7       | 62                                                       | 781       | 20                 | 254       | 13                                                       | 315       | 77                 | 1881      |
| 8       | 30                                                       | 3013      | 37                 | 3767      | 27                                                       | 64        | 61                 | 144       |
| 9       | 25                                                       | 143       | 50                 | 287       | 5                                                        | 6         | 79                 | 111       |
| 10      | 81                                                       | 540       | 10                 | 70        | 41                                                       | 49        | 30                 | 36        |
| 11      | 35                                                       | 314       | 32                 | 310       | 43                                                       | 126       | 31                 | 90        |
| 12      | 87                                                       | 3823      | 5                  | 204       | 52                                                       | 44        | 24                 | 22        |
| 13      | 51                                                       | 547       | 23                 | 249       | 2                                                        | 17        | 82                 | 623       |
| 14      | 80                                                       | 1727      | 4                  | 93        | 59                                                       | 640       | 6                  | 60        |
| 15      | 48                                                       | 368       | 31                 | 238       | 16                                                       | 28        | 51                 | 89        |
| 16      | 59                                                       | 797       | 15                 | 204       | 28                                                       | 85        | 21                 | 63        |
| 17      | 40                                                       | 133       | 38                 | 126       | 2                                                        | 1         | 91                 | 37        |
| 18      | 67                                                       | 499       | 18                 | 135       | 49                                                       | 81        | 13                 | 22        |

The total number of T<sub>RM</sub> per milligram of tissue was included

**Table S8: Differential gene expression profiles of CD103<sup>+</sup>CD8<sup>+</sup> TIL and autologous KLRG1<sup>+</sup>CD8<sup>+</sup> TIL (Related to Figures 3, 4 and 5)**

| Gene                         | Fold change | p-value                 |                                     |        |                        |
|------------------------------|-------------|-------------------------|-------------------------------------|--------|------------------------|
| <b>Activation/Th17</b>       |             |                         |                                     |        |                        |
| <i>IL17A</i>                 | 23.62       | 1.08 10 <sup>-100</sup> | <i>VCAMI</i>                        | 5.27   | 1.59 10 <sup>-2</sup>  |
| <i>TNFSF4</i>                | 20.32       | 1.69 10 <sup>-1</sup>   | <i>CD9</i>                          | 5.25   | 1.32 10 <sup>-2</sup>  |
| <i>TMGD2</i>                 | 9.32        | 8.97 10 <sup>-4</sup>   | <i>IKK</i>                          | 4.63   | 5.04 10 <sup>-2</sup>  |
| <i>IL2RB2</i>                | 7.87        | 5.28 10 <sup>-4</sup>   | <i>ITGB7</i>                        | 4.17   | 3.69 10 <sup>-2</sup>  |
| <i>CK1F</i>                  | 7.74        | 3.74 10 <sup>-3</sup>   | <i>CCR6</i>                         | 3.86   | 4.03 10 <sup>-2</sup>  |
| <i>CD2</i>                   | 7.32        | 3.67 10 <sup>-3</sup>   | <i>CXCR6</i>                        | 3.54   | 3.28 10 <sup>-3</sup>  |
| <i>CD82</i>                  | 7.26        | 6.52 10 <sup>-3</sup>   | <i>ITGAD</i>                        | 3.47   | 1.69 10 <sup>-3</sup>  |
| <i>CPN1</i>                  | 7.25        | 5.64 10 <sup>-3</sup>   | <i>CD248</i>                        | 2.64   | 1.61 10 <sup>-2</sup>  |
| <i>ICOS</i>                  | 6.72        | 4.59 10 <sup>-3</sup>   | <i>KIRC2</i>                        | 2.54   | 4.00 10 <sup>-2</sup>  |
| <i>CD6</i>                   | 6.61        | 4.29 10 <sup>-2</sup>   | <i>CD44</i>                         | -1.61  | 2.73 10 <sup>-2</sup>  |
| <i>CD226</i>                 | 6.12        | 1.33 10 <sup>-3</sup>   | <i>CXCR5</i>                        | -1.89  | 1.31 10 <sup>-3</sup>  |
| <i>IL26</i>                  | 5.69        | 1.41 10 <sup>-4</sup>   | <i>CCR4</i>                         | -2.29  | 1.93 10 <sup>-3</sup>  |
| <i>CD63</i>                  | 5.53        | 8.10 10 <sup>-3</sup>   | <i>CCR7</i>                         | -2.68  | 1.34 10 <sup>-3</sup>  |
| <i>CD109</i>                 | 5.21        | 2.61 10 <sup>-2</sup>   | <i>ITGA5</i>                        | -3.62  | 1.36 10 <sup>-2</sup>  |
| <i>IL32</i>                  | 5.11        | 2.81 10 <sup>-2</sup>   | <i>ITGAM</i>                        | -3.67  | 4.45 10 <sup>-2</sup>  |
| <i>CSF2</i>                  | 4.36        | 3.76 10 <sup>-3</sup>   | <i>SELL</i>                         | -4.88  | 1.12 10 <sup>-2</sup>  |
| <i>IRF5</i>                  | 4.31        | 1.02 10 <sup>-2</sup>   | <i>S1PR1</i>                        | -5.12  | 3.80 10 <sup>-2</sup>  |
| <i>CD101</i>                 | 4.08        | 9.70 10 <sup>-3</sup>   | <i>KIR2F1</i>                       | -5.23  | 1.58 10 <sup>-3</sup>  |
| <i>CD70</i>                  | 3.21        | 1.14 10 <sup>-2</sup>   | <i>CXCR2</i>                        | -8.84  | 2.02 10 <sup>-3</sup>  |
| <i>CD7</i>                   | 2.99        | 3.76 10 <sup>-2</sup>   | <i>CXCR1</i>                        | -8.99  | 3.23 10 <sup>-3</sup>  |
| <i>RAB2A</i>                 | 2.99        | 3.80 10 <sup>-2</sup>   | <i>CX3CR1</i>                       | -10.57 | 2.67 10 <sup>-11</sup> |
| <i>HAVCR1</i>                | 2.90        | 1.26 10 <sup>-2</sup>   | <i>KIR3G1</i>                       | -14.79 | 3.38 10 <sup>-7</sup>  |
| <i>IL17RA</i>                | 2.75        | 2.88 10 <sup>-2</sup>   | <i>ICAM2</i>                        | -19.03 | 2.51 10 <sup>-7</sup>  |
| <i>GZMB</i>                  | 2.54        | 5.54 10 <sup>-4</sup>   | <i>S1PR5</i>                        | -20.95 | 3.07 10 <sup>-9</sup>  |
| <i>IL18RAP</i>               | 2.20        | 7.86 10 <sup>-3</sup>   | <b>TRM signature</b>                |        |                        |
| <i>ITNG</i>                  | 1.99        | 4.44 10 <sup>-2</sup>   | <i>GSG2</i>                         | 8.75   | 4.73 10 <sup>-20</sup> |
| <i>GZMA</i>                  | 1.68        | 2.89 10 <sup>-2</sup>   | <i>GPR34</i>                        | 7.45   | 8.42 10 <sup>-3</sup>  |
| <i>CD244</i>                 | 1.52        | 1.18 10 <sup>-2</sup>   | <i>ITGAE</i>                        | 5.90   | 1.51 10 <sup>-28</sup> |
| <i>IL2RG</i>                 | 1.45        | 4.89 10 <sup>-2</sup>   | <i>CXCR6</i>                        | 3.29   | 3.89 10 <sup>-9</sup>  |
| <i>TNFRSF25</i>              | 1.39        | 2.34 10 <sup>-2</sup>   | <i>ACP5</i>                         | 2.64   | 5.14 10 <sup>-2</sup>  |
| <i>TGFB3</i>                 | -1.64       | 1.81 10 <sup>-2</sup>   | <i>LDLRAD4</i>                      | 2.33   | 1.28 10 <sup>-3</sup>  |
| <i>IL5</i>                   | -1.96       | 3.90 10 <sup>-2</sup>   | <i>AMICA1</i>                       | 2.21   | 9.58 10 <sup>-3</sup>  |
| <i>CD28</i>                  | -2.13       | 3.97 10 <sup>-3</sup>   | <i>ATP10D</i>                       | 2.15   | 2.28 10 <sup>-3</sup>  |
| <i>GZMK</i>                  | -3.44       | 7.07 10 <sup>-3</sup>   | <i>ITNG</i>                         | 2.00   | 3.24 10 <sup>-3</sup>  |
| <i>IL2A</i>                  | -3.47       | 7.91 10 <sup>-3</sup>   | <i>ABTB2</i>                        | 1.83   | 1.24 10 <sup>-2</sup>  |
| <b>Inhibition/exhaustion</b> |             |                         | <i>QPCT</i>                         | 1.80   | 6.25 10 <sup>-2</sup>  |
| <i>ENTPD1</i>                | 56.05       | 5.21 10 <sup>-9</sup>   | <i>XCL1</i>                         | 1.67   | 2.53 10 <sup>-2</sup>  |
| <i>LAYN</i>                  | 21.84       | 1.22 10 <sup>-9</sup>   | <i>CD244</i>                        | 1.59   | 4.16 10 <sup>-3</sup>  |
| <i>SPRY1</i>                 | 9.09        | 2.28 10 <sup>-4</sup>   | <i>KCNN4</i>                        | 1.57   | 2.78 10 <sup>-2</sup>  |
| <i>CD200</i>                 | 7.74        | 2.71 10 <sup>-3</sup>   | <i>RACGAP1</i>                      | 1.53   | 8.43 10 <sup>-2</sup>  |
| <i>CTLA4</i>                 | 5.14        | 1.48 10 <sup>-2</sup>   | <i>M-APKAP3</i>                     | 1.52   | 6.95 10 <sup>-4</sup>  |
| <i>BTLA</i>                  | 4.70        | 1.98 10 <sup>-3</sup>   | <i>P2RY10</i>                       | 1.45   | 6.20 10 <sup>-2</sup>  |
| <i>HAVCR2</i>                | 2.78        | 3.66 10 <sup>-3</sup>   | <i>CCL5</i>                         | 1.42   | 5.59 10 <sup>-2</sup>  |
| <i>PDCD1</i>                 | 2.63        | 1.79 10 <sup>-2</sup>   | <i>PCEID1B</i>                      | 1.41   | 1.04 10 <sup>-2</sup>  |
| <i>LAG3</i>                  | 2.20        | 8.93 10 <sup>-3</sup>   | <i>VOPP1</i>                        | 1.31   | 2.05 10 <sup>-2</sup>  |
| <i>TIGIT</i>                 | 1.86        | 5.22 10 <sup>-3</sup>   | <i>ABB</i>                          | 1.30   | 3.85 10 <sup>-2</sup>  |
| <i>CBLB</i>                  | 1.43        | 4.85 10 <sup>-2</sup>   | <i>DOCK2</i>                        | 1.27   | 5.22 10 <sup>-2</sup>  |
| <i>TOX</i>                   | 1.96        | 3.15 10 <sup>-4</sup>   | <i>CDC25B</i>                       | -1.22  | 6.84 10 <sup>-2</sup>  |
| <i>TOX2</i>                  | 12.96       | 3.71 10 <sup>-4</sup>   | <i>LITAF</i>                        | -1.25  | 3.67 10 <sup>-2</sup>  |
| <i>SPRY2</i>                 | -2.91       | 3.97 10 <sup>-2</sup>   | <i>NEDD4</i>                        | -1.36  | 4.25 10 <sup>-2</sup>  |
| <b>Transcription factors</b> |             |                         | <i>BCL9L</i>                        | -1.38  | 2.85 10 <sup>-2</sup>  |
| <i>ILF3</i>                  | 17.93       | 6.01 10 <sup>-3</sup>   | <i>STK38</i>                        | -1.41  | 1.52 10 <sup>-3</sup>  |
| <i>ATP8B4</i>                | 17.50       | 1.53 10 <sup>-9</sup>   | <i>FAM65B</i>                       | -1.48  | 6.78 10 <sup>-2</sup>  |
| <i>GF11</i>                  | 9.24        | 5.20 10 <sup>-4</sup>   | <i>SAMHD1</i>                       | -1.50  | 1.78 10 <sup>-3</sup>  |
| <i>IRF3</i>                  | 7.75        | 9.65 10 <sup>-4</sup>   | <i>FRMD4B</i>                       | -1.84  | 2.72 10 <sup>-2</sup>  |
| <i>ZEB1</i>                  | 7.38        | 8.53 10 <sup>-4</sup>   | <i>LEF1</i>                         | -1.87  | 8.56 10 <sup>-3</sup>  |
| <i>ZNF683</i>                | 6.55        | 4.10 10 <sup>-4</sup>   | <i>PDE2A</i>                        | -1.90  | 9.30 10 <sup>-2</sup>  |
| <i>ZNF384</i>                | 5.28        | 3.91 10 <sup>-2</sup>   | <i>ICAM2</i>                        | -1.94  | 2.59 10 <sup>-4</sup>  |
| <i>FOX.B</i>                 | 5.22        | 1.72 10 <sup>-2</sup>   | <i>RASA3</i>                        | -2.34  | 1.88 10 <sup>-7</sup>  |
| <i>IKZF4</i>                 | 5.05        | 1.10 10 <sup>-2</sup>   | <i>EOMES</i>                        | -2.35  | 2.18 10 <sup>-3</sup>  |
| <i>FOX P3</i>                | 4.80        | 9.39 10 <sup>-4</sup>   | <i>KIF2</i>                         | -2.46  | 1.58 10 <sup>-4</sup>  |
| <i>BACH1</i>                 | 4.43        | 1.62 10 <sup>-2</sup>   | <i>TCF7</i>                         | -2.47  | 7.30 10 <sup>-4</sup>  |
| <i>E2F7</i>                  | 4.00        | 5.09 10 <sup>-2</sup>   | <i>FAM9A</i>                        | -2.95  | 9.02 10 <sup>-3</sup>  |
| <i>ATF2</i>                  | 3.90        | 2.29 10 <sup>-2</sup>   | <i>KIF3</i>                         | -3.57  | 3.29 10 <sup>-9</sup>  |
| <i>ZBED2</i>                 | 3.89        | 5.34 10 <sup>-1</sup>   | <i>S1PR1</i>                        | -3.62  | 5.05 10 <sup>-10</sup> |
| <i>PRDM1</i>                 | 3.87        | 7.71 10 <sup>-3</sup>   | <i>S1PR5</i>                        | -19.54 | 3.11 10 <sup>-10</sup> |
| <i>TSC2</i>                  | 3.77        | 2.20 10 <sup>-2</sup>   | <b>Lung cancer T-cell signature</b> |        |                        |
| <i>PRDM5</i>                 | 3.53        | 1.08 10 <sup>-2</sup>   | <i>CTLA4</i>                        | 3.45   | 3.63 10 <sup>-9</sup>  |
| <i>IKKKB</i>                 | 3.40        | 2.84 10 <sup>-2</sup>   | <i>CXCR6</i>                        | 3.29   | 3.89 10 <sup>-9</sup>  |
| <i>BAIF3</i>                 | 3.03        | 2.86 10 <sup>-2</sup>   | <i>PDCD1</i>                        | 2.43   | 5.61 10 <sup>-10</sup> |
| <i>PRDM2</i>                 | 2.72        | 4.35 10 <sup>-2</sup>   | <i>SIRPG</i>                        | 2.43   | 8.78 10 <sup>-4</sup>  |
| <i>RUNX2</i>                 | 2.50        | 3.70 10 <sup>-2</sup>   | <i>PTPN22</i>                       | 1.98   | 2.52 10 <sup>-2</sup>  |
| <i>RUNX3</i>                 | 2.24        | 1.95 10 <sup>-3</sup>   | <i>CD2</i>                          | 1.85   | 7.75 10 <sup>-4</sup>  |
| <i>E2F2</i>                  | 2.13        | 2.45 10 <sup>-2</sup>   | <i>SIFI</i>                         | 1.70   | 2.32 10 <sup>-3</sup>  |
| <i>IKZF3</i>                 | 2.01        | 1.54 10 <sup>-3</sup>   | <i>TIGIT</i>                        | 1.71   | 1.41 10 <sup>-2</sup>  |
| <i>BAIF</i>                  | 1.52        | 4.20 10 <sup>-2</sup>   | <i>UBASH3A</i>                      | 1.60   | 4.88 10 <sup>-3</sup>  |
| <i>E2F3</i>                  | -1.60       | 2.35 10 <sup>-2</sup>   | <i>GPRI74</i>                       | 1.59   | 6.17 10 <sup>-3</sup>  |
| <i>IKZF2</i>                 | -1.63       | 2.06 10 <sup>-2</sup>   | <i>CD96</i>                         | 1.56   | 1.82 10 <sup>-2</sup>  |
| <i>BCL6</i>                  | -1.93       | 2.13 10 <sup>-2</sup>   | <i>SLAMF1</i>                       | 1.51   | 6.32 10 <sup>-2</sup>  |
| <i>EOMES</i>                 | -2.38       | 1.34 10 <sup>-3</sup>   | <i>SLA2</i>                         | 1.49   | 8.64 10 <sup>-3</sup>  |
| <i>KIF2</i>                  | -2.58       | 8.57 10 <sup>-4</sup>   | <i>CCR5</i>                         | 1.45   | 5.51 10 <sup>-2</sup>  |
| <i>KIF3</i>                  | -3.60       | 1.26 10 <sup>-3</sup>   | <i>P2RY10</i>                       | 1.45   | 6.20 10 <sup>-2</sup>  |
| <i>TCF7</i>                  | -4.03       | 1.39 10 <sup>-2</sup>   | <i>CCL5</i>                         | 1.42   | 5.59 10 <sup>-2</sup>  |
| <b>Adhesion/migration</b>    |             |                         | <i>LCK</i>                          | 1.41   | 2.99 10 <sup>-2</sup>  |
| <i>ITGAE</i>                 | 31.99       | 1.37 10 <sup>-104</sup> | <i>SASB</i>                         | 1.37   | 7.11 10 <sup>-2</sup>  |
| <i>CXCL13</i>                | 18.40       | 1.28 10 <sup>-10</sup>  | <i>TBC1D10C</i>                     | 1.37   | 9.11 10 <sup>-2</sup>  |
| <i>ITGA7</i>                 | 8.16        | 2.30 10 <sup>-3</sup>   | <i>IL2RG</i>                        | 1.33   | 2.67 10 <sup>-2</sup>  |
| <i>KIRC1</i>                 | 8.10        | 1.81 10 <sup>-4</sup>   | <i>IL2RB1</i>                       | 1.25   | 7.00 10 <sup>-2</sup>  |
| <i>CCR5</i>                  | 6.41        | 1.90 10 <sup>-2</sup>   | <i>CST7</i>                         | -1.54  | 2.73 10 <sup>-2</sup>  |
| <i>ITGA1</i>                 | 5.96        | 6.27 10 <sup>-3</sup>   |                                     |        |                        |

**Table S9: Hallmark gene sets enriched in T<sub>RM</sub> cells (Related to Figure 4)**

| Hallmark gene set          | NES   | p-value | Core enrichment                                                                                                                                                                                                                                                                                                                                                                                                                                                                                                        |
|----------------------------|-------|---------|------------------------------------------------------------------------------------------------------------------------------------------------------------------------------------------------------------------------------------------------------------------------------------------------------------------------------------------------------------------------------------------------------------------------------------------------------------------------------------------------------------------------|
| TNFA_SIGNALING_VIA_NFKB    | -0,95 | 0,54    | ZBTB10,SQSTM1,CLCF1,DENND5A,KLF2,CFLAR,IFNGR2,ICAM1,ACKR3,PLEK,NINJ1,SOD2,SLC2A6                                                                                                                                                                                                                                                                                                                                                                                                                                       |
| PEROXISOME                 | -1,35 | 0,11    | LONP2,SOD2,IDE,TSP0,SLC23A2                                                                                                                                                                                                                                                                                                                                                                                                                                                                                            |
| TGF_BETA_SIGNALING         | 1,05  | 0,42    | NCOR2,SMURF2,CTNNB1                                                                                                                                                                                                                                                                                                                                                                                                                                                                                                    |
| PI3K_AKT_MTOR_SIGNALING    | 1,08  | 0,39    | CAMK4,PIK3R3,TSC2,MKNK1,RPS6KA1,CDK1,MYD88,AP2M1,MAPKAP1,CDK1,ACTR2,FASLG,ARPC3,MKNK1,RAF1,RPS6KA3,PIN1,CAB39,RPTOR                                                                                                                                                                                                                                                                                                                                                                                                    |
| MYC_TARGETS_V2             | 1,13  | 0,32    | LAS1L,UNG,PES1,MCM5,TBRG4,SLC19A1,PLK4,MCM4,MCM5,IMP4                                                                                                                                                                                                                                                                                                                                                                                                                                                                  |
| IL6_JAK_STAT3_SIGNALING    | 1,14  | 0,29    | CXCL13,CD9,IL4R,CSF2,MYD88,CSF1,IRF9,CSF1,IL17RA,ITGA4,EBI3,FAS,IL6ST,                                                                                                                                                                                                                                                                                                                                                                                                                                                 |
| INFLAMMATORY_RESPONSE      | 1,15  | 0,27    | AB11,CD82,SRI,P2RX4,SRI,P2RX7,NLRP3,IRF7,ATP2C1,IL4R,LTA,SEMA4D                                                                                                                                                                                                                                                                                                                                                                                                                                                        |
| FATTY_ACID_METABOLISM      | 1,17  | 0,28    | DLST,GCDH,ECI2,PPARA,ACOX1,AUH,ECI2,SDHC,CRYZ,HPGD,D2HGDH,GSTZ1,HIBCH,ECI2                                                                                                                                                                                                                                                                                                                                                                                                                                             |
| INTERFERON_GAMMA_RESPONSE  | 1,18  | 0,25    | P1PN6,DDX58,SRI,TRIM25,VCAM1,IRF7,IL4R,NCOA3,GPR18,RNF31,IRF5,TRAFD1,RNF31,ITGB7,MYD88,ST3GAL5,RSAD2,IFI35,IFNAR2,XAF1,IRF9                                                                                                                                                                                                                                                                                                                                                                                            |
| WNT_BETA_CATENIN_SIGNALING | 1,39  | 0,11    | NCOR2,RBPJ,PPARD,CTNNB1,NCSTN,JAG2,NCSTN,NUMB                                                                                                                                                                                                                                                                                                                                                                                                                                                                          |
| OXIDATIVE_PHOSPHORYLATION  | 1,43  | 0,07    | SLC25A12,ATP6V1H,DLST,COX4I1,NDUFV1,BAX,IMMT,MGST3,VDAC3,NNT,MAOB,ATP5A1,PHYH,SLC25A11,ATP6V0B,RHOT1,SDHC,ATP5G1,ATP5G2, HTRA2,MGST3,ATP5J,ATP5L                                                                                                                                                                                                                                                                                                                                                                       |
| DNA_REPAIR                 | 1,59  | 0,02    | RNMT,NME3,LIG1,TAF6,NT5C,ERCC2,POLA2,ZWINT,TSG101,RAD51,ERCC2,ZWINT,POLD1,ITPA,PRIMI,POLD3,POLR1C,CANT1,POLD2,GTF2H3                                                                                                                                                                                                                                                                                                                                                                                                   |
| MTORC_SIGNALING            | 1,67  | 0,01    | BUB1,QDPR,AURKA,SYTL2,SYTL2,CDC25A,PIK3R3,ELOVL6,SHMT2,GSR,CD9,VLDLR,IMMT,DHFR,UNG,RRM2,SYTL2,ASNS,AURKA,UCHL5,EPRS,CCT6A,TFRC,AK4,SYTL2,PFKL,ATP5G1,PSMA4,SYTL2,TFRC,EBP,TM7SF2,NFYC,ACTR2,P4HA1,NAMPT,MTHFD2,FDXR,MCM4,G6PD,GBE1,SYTL2,MCM4,STIP1,NAMPT,HMBS,SYTL2                                                                                                                                                                                                                                                   |
| PROTEIN_SECRETION          | 1,83  | 0,01    | STX16,ATP6V1H,SEC31A,CD63,TSG101,PAM,ARFIP1,VPS45,RAB2A,PAM,AP2M1,GOLGA4,COPB1,ICA1,SGMS1,CLTA,GOSR2,SGMS1,SNAP23,TPD52                                                                                                                                                                                                                                                                                                                                                                                                |
| IL2_STAT5_SIGNALING        | 1,89  | 0,001   | ITGAE,CAPG,NCST1,BCL2L1,HOPX,ICOS,TNFRSF8,MYO1E,P2RX4,SNX14,CTLA4,IKZF4,RABGAP1L,IL4R,NCOA3,FLT3LG,FAH,PHTF2,MYO1E,CSF2,TNFRSF8, ST3GAL4,PLAGL1,PLEC,MYO1C                                                                                                                                                                                                                                                                                                                                                             |
| E2F_TARGETS                | 2,09  | 0,001   | ILF3,BUB1B,MELK,LIG1,BIRC5,DLGAP5,AURKA,CDC25A,CIT,POLA2,ESPL1,MELK,WDR90,AURKB,MCM3,RAD51C,BRCA1,HMMR,SMC4,POLD1,UNG,POLD2,RRM2,CDK1,POLD3,STAG1,MKI67,RAD51AP1,PSMC3IP,AURKA,CDKN2A,SMC4,BRCA2,CDKN3,WEE1,CENPE,AURKB,GINS3,TFRC,EIF2S1,NUP107,MYBL2,AURKB,TMPO,RACGAP1,MCM5,TBRG4,CENPM,KIF2C,TFRC,CDC20,LIG1,ORC6,CDK1,ATAD2,CCNE1,CDCA3,EZH2,RFC2,DEPDC1,SMC4,SPAG5,CIT,CDCA3,HELLS,SMC4,STAG1,MTHFD2,RAD51AP1,POLE,TCF19,CKS1B,PRKDC,PLK4,MCM4,DNMT1,SMC6,CDKN2A,TRIP13,POLD3,DEK,EXOSC8,PLK4,KPNA2,RAD51C,BARD1 |
| G2M_CHECKPOINT             | 2,38  | 0,001   | ILF3,MTHFD2,SMC2,BUB1,PRC1,BIRC5,TPX2,AURKA,CDC25A,NUSAP1,KIF15,EXO1,TROAP,POLA2,ESPL1,NUSAP1,AURKB,MCM3,KIF23,HMMR,PRC1,SMC4,SMC2,CBX1,MLE3,STIL,TNPO2,CDK1,STAG1,CHMP1A,MKI67,KIF23,AURKA,NUSAP1,TRAIP,BRCA2,EXO1,TTK,SS18,SS18,CDKN3,ODF2,CENPE,CDK7,AURKB,DKC1,CASP8AP2,PBK,CDC27,TROAP,MYBL2,AURKB,EWSR1,TRAIP,KIF23,TMPO,RACGAP1,MCM5,SMC2,TRAIP,KIF2C,SRSF10,CDC20, ORC6,PAFAH1B1,CDK1,RBM14,EZH2                                                                                                               |

NES: Normalized enrichment score

**Table S10: Primer pair sequences for RT-PCR (Related to STAR methods)**

|               |                                  |
|---------------|----------------------------------|
| IKZF3 Forward | AGATTTGAATGTGCCCTGGT             |
| IKZF3 Reverse | TGTCTTGCCTCCGCACTT               |
| RORC Forward  | CTTGCCGTAGGGATGTCTCG             |
| RORC Reverse  | GAAGTTCCGTCAGCCCGTT              |
| AHR Forward   | TAACCCAGACCAGATTCCTCCAGA         |
| AHR Reverse   | CCCTTGGAAATTCATTGCCAGA           |
| IL17A Forward | AACGATGACTCCTGGGAAGA             |
| IL17A Reverse | GGATTTTCGTGGGATTGTGAT            |
| TCF7 Forward  | CGGGACAGGACCATTACAAGTAGATCAAGGAC |
| TCF7 Reverse  | CCACCTGCCTCGGCCTGCCAAAGT         |
| S1PR1 Forward | CAGACAAGCAAAACAAAGTG             |
| S1PR1 Reverse | CATCAACAAAAGTGCCAAAG             |
| 18S Forward   | CGGACAGGATTGACAGATTG             |
| 18S Reverse   | CAATCGCTCCACCAACTAA              |
